# 1 Librator, a platform for optimized sequence editing, 2 design, and expression of influenza virus proteins

3 Lei Li<sup>1</sup>, Olivia Stovicek<sup>1</sup>, Jenna J. Guthmiller<sup>1</sup>, Siriruk Changrob<sup>1</sup>, Yanbin Fu<sup>1</sup>, Haley L. Dugan<sup>2</sup>,  
4 Christopher T. Stamper<sup>2</sup>, Nai-Ying Zheng<sup>1</sup>, Min Huang<sup>1</sup>, Patrick C. Wilson<sup>1,2,3,\*</sup>

## 5 6 **Affiliations:**

7 <sup>1</sup>Section of Rheumatology, Department of Medicine, University of Chicago, Chicago, IL 60637, USA.

8 <sup>2</sup>Committee on Immunology, University of Chicago, Chicago, IL 60637, USA.

9 <sup>3</sup>Lead Contact.

10 \*Correspondence: wilsonp@uchicago.edu (P.C.W.)

## 11 12 13 **Abstract**

14 Artificial mutagenesis and chimeric/mosaic protein engineering have laid the foundation for  
15 antigenic characterization<sup>1</sup> and universal vaccine design<sup>2-4</sup> for influenza viruses. However, many  
16 methods used for influenza research and vaccine development require sequence editing and protein  
17 expression, limiting their applicability and the progress of related research to specialists. Rapid  
18 tools allowing even novice influenza researchers to properly analyze and visualize influenza  
19 protein sequences with accurate nomenclature are needed to expand the research field. To address  
20 this need, we developed Librator, a system for analyzing and designing protein sequences of  
21 influenza virus Hemagglutinin (HA) and Neuraminidase (NA). With Librator's graphical user  
22 interface (GUI) and built-in sequence editing functions, biologists can easily analyze influenza  
23 sequences and phylogenies, automatically port sequences to visualize structures, then readily  
24 mutate target residues and design sequences for antigen probes and chimeric/mosaic proteins  
25 efficiently and accurately. This system provides optimized fragment design for Gibson Assembly<sup>5</sup>  
26 of HA and NA expression constructs based on peptide conservation of all historical HA and NA  
27 sequences, ensuring fragments are reusable and compatible, allowing for significant reagent  
28 savings. Use of Librator will significantly facilitate influenza research and vaccine antigen design.  
29

## 30 **Main**

31 Influenza is considered to be the next major threat for a devastating pandemic. Vaccination has  
32 been proven an effective approach to prevent infection and global spreading of influenza viruses<sup>6</sup>.  
33 However, due to frequent mutations in the influenza virus genome, and particularly alterations to  
34 the HA and NA surface proteins, influenza vaccine protection is short-lived or mostly ineffective  
35 when mismatches have been observed for several flu seasons<sup>7, 8</sup>. In this context, developing  
36 universal influenza vaccine candidates that induce broadly reactive immunity and particularly  
37 antibodies against conserved epitopes of influenza virus surface proteins is an important direction  
38 of research<sup>4, 9-12</sup>. Use of artificial mutagenesis and design of antigen probes and chimeric/mosaic  
39 proteins are crucial steps in vaccine development and related research. However, current workflow  
40 for these tasks faces several major challenges that make it expensive, fallible and time-consuming.  
41 First, there are multiple residue numbering systems for HA protein sequences that have been  
42 commonly used in the literature, protocols and the research community<sup>13, 14</sup>. They are Coding  
43 Sequence (CDS) position, crystal structure-based H1/H3 numbering<sup>15-17</sup>, and Burke and Smith HA  
44 numbering. For a given sequence, CDS position usually counts from the start of the CDS,

45 methionine, and therefore can cover all amino acids; structure-based H1/H3 numbering and Burke  
46 and Smith HA numbering determine residue numbers according to template mapping using  
47 different templates (see methods section for details). Thus, biologists must put significant effort  
48 into identifying the correct residues to avoid errors. Moreover, nucleotide and amino acid  
49 sequences are difficult to read, and inefficient and fallible to edit manually. Further, there are no  
50 comprehensive tools to develop individual influenza sequence databases and readily compare  
51 varied influenza sequences and phylogenies, or to immediately port annotated sequences for  
52 visualization of color-coded antigenic-regions, mutations, or epitopes on representative HA and  
53 NA structures using structure analysis software such as PyMol and UCSF Chimera. Finally,  
54 efficient and automated cloning of HA and NA protein variants to scale can become expensive and  
55 is error-prone if done by hand. Gibson Assembly can assemble multiple linear DNA fragments for  
56 protein cloning and expression and has been extensively used in molecular biology, and is superior  
57 among all assembly methods because of the enormous savings of time and human labor with its  
58 easy one-tube reactions. Automated Gibson fragment prediction and databasing of fragments  
59 conserved between similar HA and NA protein expression constructs would allow accurate and  
60 cost-effective production of variant influenza protein libraries for many applications. In conclusion,  
61 these broad challenges in current influenza immunology/virology studies limit the efficiency and  
62 breadth of research. Improving the accuracy and economy of these processes will significantly  
63 expand related studies both in seasoned influenza laboratories and for novice laboratories  
64 interested in applying innovative approaches to the study of influenza.

65  
66 Here, we present a computational tool called “Librator” for influenza HA and NA sequence  
67 analysis, editing, and cost-effective cloning and vector design for HA and NA protein expression.  
68 Librator is an integrated graphical processing platform for influenza sequences. Librator  
69 seamlessly connects nucleotide sequences (from public sequence databases) and lab work (e.g.  
70 Gibson cloning, protein expression), and it contains a variety of functions to facilitate management,  
71 analysis, editing and accessing influenza sequences, to improve the efficiency of sequence design  
72 and expression (Figure 1A). This software entrusts all error-prone sequence editing and data  
73 processing tasks to the background algorithm, so that users are able to design their sequences with  
74 a few clicks on the GUI. With Librator users can complete all sequence design-related operations  
75 graphically in an integrated system, avoiding difficult-to-read raw sequences or switching between  
76 different software applications.

77  
78 Multiple common functions were built-in to Librator to help users analyze influenza sequences  
79 more efficiently. First, an HA numbering aligner was integrated into Librator’s sequence viewer  
80 and editor. This function aligns given HA sequences to crystal structures of a classic H1 (PDB ID:  
81 4JTV) and a classic H3 template (PDB ID: 4HMG) to identify corresponding H1/H3 numberings  
82 for each residue. Known common antigenic sites and epitopes are automatically labelled based on  
83 this numbering; for example antibody binding sites (ABS), receptor binding sites (RBS), and the  
84 H1 (Ca1, Ca2, Cb, Sa, Sb, Stalk) and H3 (A, B, C, D, E Stalk) antigenic sites are color-coded on  
85 H1/H3 numbering rulers (Figure 1B). Notably, epitope definitions in Librator are highly  
86 customizable, allowing users to annotate HA sequences according to their specific research interest  
87 and focus (Figure S1A). Since glycosylation on the HA protein was reported to have an important  
88 impact on antigenic drift<sup>18, 19</sup>, an “N-X-S/T” pattern that indicates potential N-linked glycosylation  
89 sites are also highlighted. This viewer is also capable of displaying fully annotated multiple  
90 sequence alignments with two informative modes, original sequence mode and template mode,

91 enabling convenient investigation of evolutionary sequence patterns and mutations (Figure 1C).  
92 For example, biologists characterizing escape mutant sequences induced by selective pressure with  
93 antibodies or sera can align the HA or NA sequences and immediately visualize and export  
94 graphics of regions that were mutated. To help users quickly infer phylogenetic relationships  
95 among a group of sequences, Librator also allows users to generate and visualize maximal  
96 likelihood trees from either nucleotide sequences or peptide sequences (Figure 1D). Furthermore,  
97 powered by WebLogo, Librator allows users to access nucleotide and peptide conservation among  
98 groups of sequences<sup>20</sup> (Figure 1E). By automatically porting amino acid sequences and labelling  
99 instructions to PyMOL<sup>21</sup> or UCSF Chimera<sup>22</sup>, Librator allows users to visualize peptides on 3D  
100 structures of HA proteins with color-annotated amino acids according to either peptide  
101 conservation score (Figure 1E) or all antigenic regions and user-defined sequence labels (Figure  
102 1F). Librator uses an H1 structure (PDB ID: 4JTV) for visualization of all Group 1 HA structures  
103 and a H3 structure (PDB ID: 4HMG) for visualization of all Group 2 HA structures<sup>23-25</sup>. For  
104 example, with a single button-click, users can immediately evaluate whether an escape mutation  
105 is predicted to alter a surface amino acid or occurs deeper in the structure potentially driving  
106 conformational changes. In addition, a function was also developed that allows users to identify  
107 potential key residues between two groups of sequences by ranking residues by their amino acid  
108 difference. For example, by comparing pre-1994 and post-1994 human H1N1 seasonal viruses,  
109 Librator highlighted the importance of a deletion “ $\Delta$ 130,” which has been validated by  
110 experiments<sup>26</sup>, by a high ranking score. This tool helps users zero in on important sequence  
111 elements driving influenza evolution. Lastly, an independent viewer for users to easily access the  
112 Burke and Smith HA numbering scheme proposed by Burke et al. was implemented since it has  
113 also been commonly used in the Influenza community<sup>13</sup>(Figure S1B). It should be noted, however,  
114 that all functions in Librator, including the alignment viewer, sequence editing, and sequence  
115 designing, were based on structure-based numbering systems.

116  
117 To improve the efficiency and accuracy of mutagenesis and sequence editing, we developed  
118 multiple functions to help users to design and edit their Influenza sequences. With the help of the  
119 HA numbering aligner, users can easily locate target residues and mutate them by simply typing a  
120 mutation code using whichever numbering system they prefer. For example, for an H3 sequence  
121 (A/England/80740425/2018), typing “Y177M” in CDS position input will mutate the 177<sup>th</sup> residue  
122 of the CDS from Tyrosine (Y) to Methionine (M). This is equivalent to typing “Y164M” in H1  
123 numbering HA1 input or typing “Y161M” in H3 numbering HA1 input (Figure 2A). By translating  
124 between the various numbering schema, Librator avoids confusion and mistakes that are common  
125 in analyzing influenza sequence data. For NA sequences, only CDS position input is available  
126 since it is the only numbering system for NA sequences. To avoid mistakes, Librator validates the  
127 original amino acid in the mutation code to make sure it matches the amino acid in the raw  
128 sequence in the numbering system used. Expression of influenza HA soluble proteins for  
129 experimental purposes is an important tool for characterizing influenza immunity or monoclonal  
130 antibody specificity. Building on this mutagenesis function, we also developed a function to design  
131 HA expression constructs for most HA subtypes (H1–H15, see methods section for details) with  
132 one click that replaces the flexible linker and transmembrane region with a stabilizing  
133 Trimerization domain, an Avitag for mono-biotinylation, and a histidine six-mer (H6) sequence  
134 for nickel-based purification (Figure 2B)<sup>27</sup>. Using the “probe option” of this function also  
135 introduces a “Y98F” mutation (H3 numbering) that reduces binding to sialic acid for probes to be  
136 used in cellular assays such as for flow cytometric sorting of HA-specific B cells<sup>28</sup> or Libra-seq<sup>29</sup>.

137 In addition to the mutagenesis function, Librator also provides several sequence editing modes.  
138 For example, the Cocktail mode allows users to compare a donor sequence to a template sequence  
139 and scan all amino acid differences between them. Then Librator will automatically generate  
140 multiple sequences based on the template sequence with each identified mutation or their  
141 combinations (Figure 2C). This function improves the efficiency of identifying key residues  
142 between antigenically or functionally distinct viruses. Users can instantaneously generate a library  
143 of point mutant variants for expression to, for example, identify which amino acids differing  
144 between two HA molecules are important for the binding of a monoclonal antibody or drive  
145 differential function of the compared HA molecules, such as host-species tropism. With these  
146 functions, users can generate demanded mutations in batches in minutes, compared with manual  
147 generation of mutated sequences that usually takes at least several hours.

148  
149 We also implemented a sequence designer in Librator to facilitate complicated sequence design.  
150 Current influenza vaccine-antigen design efforts aim to retarget immunity away from some  
151 epitopes and focused on others through the production of chimeric and mosaic HA and NA proteins.  
152 Compared to individual mutagenesis, chimeric and mosaic sequence design usually requires  
153 mutating multiple regions (groups of residues) or even splicing sequences together from multiple  
154 influenza strains. Large numbers of mutations and complex design make manual design of  
155 chimeric/mosaic HA proteins difficult and prone to error. To overcome this challenge, Librator  
156 includes an interactive GUI to enable easy and efficient design of chimeric and mosaic proteins  
157 (Figure 2D). Using the graphical sequence viewer, users can easily specify and highlight regions  
158 to be replaced on a template sequence and regions to be inserted from a donor sequence. A  
159 dedicated viewer displays the current product with information about all replacements. After users  
160 review and confirm the current product in the product viewer, Librator will generate a new record  
161 of the user-designed product, with nucleotide sequence, subtype (same as template) and mutated  
162 residues. Using Librator, biologists can easily design complicated chimeric and mosaic HA/NA  
163 sequences with extensive mutations or replacement of entire epitopes or regions. Use of Librator  
164 in our lab has enormously improved the efficiency and accuracy of sequence design.

165  
166 Librator's cloning functions also maximizes the economy, practicality, and accuracy of  
167 synthesizing nucleotide sequences for expression by Gibson cloning using a recipe-based  
168 generator. For this Librator capitalizes on the fact that Gibson cloning uses sequence homology  
169 of a short overlap/joint region (usually 20–25bp) between neighboring fragments and also that  
170 most HA and NA sequences of a type have highly conserved and homologous regions interspersed  
171 with the variable sequence elements. Natural mutations in these proteins are enriched in only a few  
172 highly variable regions (e.g. epitopes, antibody binding sites) (Figure 3A). The cloning algorithm  
173 of Librator optimizes fragment design for HA and NA sequences to maximize the reusability of  
174 gene fragments. Librator typically produces HA as four fragments (user customizable) or NA as  
175 three fragments and databases all previous fragments generated by a lab so that new HA molecules  
176 differing in only one fragment can be synthesized by replacing only the single fragment based on  
177 an automatically generated recipe specifying the existing fragments in the laboratories inventory  
178 and the new sequence to be synthesized (Figure 3B). For example, an escape mutant HA of a  
179 particular strain may contain only several amino acid changes within a single antigenic site in one  
180 fragment of the construct. If the original variant was designed by Librator and expressed in the lab,  
181 the escape variant can now be synthesized at only 1/4<sup>th</sup> the cost. This function become particularly  
182 cost-effective when libraries of point-mutants are generated. For this, Librator identifies potential



183 overlapping regions by locating highly conserved regions based on peptide conservation of all  
184 historical HA and NA sequences. These regions are then used to define fragments on a template  
185 sequence for each subtype or group of subtypes, ensuring that end compatibility of fragments is  
186 unaffected by sporadic mutations, insertions or deletions. In Librator, all query sequences are  
187 aligned to the appropriate template sequence to ensure fragments from different batches are subject  
188 to the same design, guaranteeing their reusability. Users can clone and express their HA and NA  
189 sequences for a reduced cost by reusing fragments in their inventory (Figure 3C). The more  
190 sequences users clone, the more comprehensive a fragment inventory they will amass, enabling  
191 more fragment reuse and reagent saving. This is extremely beneficial for labs that are investing  
192 continuing efforts and resources into influenza research.

193  
194 According to the evolutionary history of influenza HA subtypes, we designed uniform fragments  
195 on the basis of a classic H1 sequence (A/California/7/2009, H1N1) and a classic H3 sequence  
196 (A/Aichi/2/1968, H3N2). We aligned all group 1 HAs (H1, H2, H5, H6, H8, H9, H11, H12, H13,  
197 H16, H17, and H18) to the H1 template and all group 2 HAs (H3, H4, H7, H10, H14, and H15) to  
198 the H3 template for fragment design (Table S1,S2, Figure S2). For NAs, we designed uniform  
199 fragments for each subtype by aligning each of the NA sequences to the template of their respective  
200 subtypes (Table S1, Figure S3). This template-mapping-based fragment design ensures that all  
201 fragments are standardized and not affected by either different batches or sporadic  
202 insertion/deletion events (e.g. a deletion  $\Delta$ 130 between pre-1994 and post-1994 human seasonal  
203 H1N1, or insertions in the cleavage site of high pathogenic avian H5 and H7)<sup>26, 30, 31</sup>. We applied  
204 this system to several applications to validate its effectiveness and compatibility. Lab practices  
205 demonstrated that this tool could help to clone and express proteins at a reduced cost. For example,  
206 reagent cost was reduced by 54% when expressing proteins with single mutations to investigate  
207 the key residues of the antigenic drift between A/HongKong/4801/2014 (H3N2) and  
208 A/Switzerland/9715293/2013 (H3N2) influenza viruses (Supplemental Data S1). Even in an  
209 extreme case of expressing HAs of 39 representative H3N2 viruses from 1968 to 2018, using  
210 Librator design only increased the reagent cost by 4% while generating many reusable gene  
211 fragments for future projects (Supplemental Data S2).

212  
213 With the effectiveness of this method verified by lab practice, we further developed several  
214 supporting functions to enable efficient workflow and a smooth user experience. We enabled users  
215 to customize the Gibson upstream connector and downstream connector to fit more vectors.  
216 Furthermore, we also designed a customizable C-terminal domain/tag region for HA proteins:  
217 Trimerization domain + Purification tag (e.g. 6xHisTag) or Trimerization domain+ AviTag +  
218 Purification tag (sequences are user customizable) for better end compatibility (Figure 3D). To  
219 reduce the risk of error, we designed an interactive GUI on which users can preview their designed  
220 fragments before generating all products (Figure 3E). All generated fragments are archived in an  
221 SQL-driven database for better data access and management. To facilitate lab reagent stock  
222 management, Librator also allows multiple users to connect to a remote MySQL fragment database  
223 (Figure 3F). Once fragments are generated by users, Librator searches the current fragment  
224 inventory, then generates a list of reusable fragments already in inventory, novel fragments that  
225 need to be ordered and recipes for all sequences. An Excel file containing fragment names and  
226 sequences in the format of a 96-well plate is also generated and can be sent to a DNA synthesis  
227 company directly. FASTA format files that contain the fragments of each sequence are generated  
228 as well, enabling users to validate their compatibility using sequence analysis software. Lastly, we

229 also developed a general fragment design feature that allows users to split any nucleotide sequence  
230 into a few customized fragments, most applicable when reusability is not a priority (Figure 3G).  
231 This feature will be helpful for novel or frontier research in particular, such as in designing Gibson  
232 cloning fragments for novel COVID-19 proteins.

233  
234 In conclusion, we developed a variety of functions associated with interactive GUIs in Librator,  
235 aiming to improve research efficiency and liberate biologists from onerous and repetitive work so  
236 that they can focus on more productive aspects of influenza research. This feature greatly facilitates  
237 the work of users who are not familiar with command-line tools, as well as reducing the possibility  
238 of mistakes. Furthermore, by the help of two widely used structure visualization tools, Librator  
239 seamlessly links users linear HA sequences to 3D structures that are annotated by peptide  
240 conservation and known epitopes. This unique feature facilitates virologists, especially those who  
241 are not expertise in structural biology, to investigate their sequences and designs from structural  
242 aspect. We also provide tools for optimized Gibson clone fragment designs for HA and NA  
243 proteins of influenza viruses, enabling low-cost protein cloning and expression. This protocol  
244 liberates more scientific potentials for related research under limited budgets, expanding the depth  
245 and breadth of related research. Looking to the future, Librator has much potential to be extended.  
246 In recent years, more and more studies have revealed epitopes on NA proteins and highlighted the  
247 importance of NA as a target of human antibodies<sup>32-35</sup>. Compared to HA, there is still a lack of  
248 knowledge of NA. In the near future, more and more studies will focus on NA and will be able to  
249 generate comprehensive profiles of epitopes on NA. Librator will be continuously updated with  
250 the latest research progress on NA. Furthermore, compared to influenza A, there is a lack of  
251 knowledge about influenza B, which also has an impact on public health and is also an important  
252 component of WHO-recommended influenza vaccine formulas. Improving support for influenza  
253 B is another future goal for Librator. Lastly, this template-based and standardized fragment design  
254 also has the potential to be extended to other viruses, such as human immunodeficiency virus (HIV)  
255 or hepatitis C virus (HCV) or coronaviruses. The modularized structure of this software is also  
256 ready for secondary development to be compatible with more biological contexts. With this in  
257 mind all source code is provided and we encourage updates and feedback and hope that Librator  
258 becomes a community-based tool and development effort.

259  
260

## 261 **Methods**

### 262 ***Dataset***

263 All the HA and NA sequences used in this study were downloaded from the NCBI FLU database  
264 (<https://www.ncbi.nlm.nih.gov/genomes/FLU/>)<sup>36</sup> and GISAID database  
265 (<https://www.gisaid.org/>)<sup>37</sup>. H1 protein: 2243 seasonal H1 sequences and 31575 pdm09  
266 sequences. H3 protein: 61798 sequences. NA protein: 28747 N1 sequences, 15194 N2  
267 sequences, 1430 N3 sequences, 291 N4 sequences, 382 N5 sequences, 2420 N6 sequences, 1188  
268 N7 sequences, 2446 N8 sequences and 2446 N9 sequences. All sequences are peptide sequences.

269

### 270 ***Gibson Clone fragment design for HA and NA proteins***

271 Gibson Clone fragments should be designed according to a uniform criterion that is unaffected by  
272 sporadic insertions/deletions in different strains, and all the joint regions of neighboring fragments  
273 should be located at the most conserved region. Furthermore, an optimized fragment design should  
274 also balance the reusability of each single fragment and the total number of fragments. The shorter

275 a single fragment is, the less the probability of mutations will be, enabling higher reusability of  
276 each fragment; too short a fragment length will result in a larger number of fragments, however,  
277 which highly increases the total reagent cost.

278  
279 To determine the optimized fragment design (including number of fragments and joint region  
280 location), we investigated amino acid variations of all residues of human H1, human H3 and NA  
281 (all hosts), and we quantified the amino acid variations by an amino acid variation entropy  
282 function<sup>20</sup>.

$$S_{obs} = - \sum_{n=1}^N p_n \log_2 p_n$$
$$p_n = count_n / \sum_{n=1}^N count_n$$

283  
284  
285  $S_{obs}$  denotes the entropy of the observed symbol.  $p_n$  denotes the frequency of the  $n$ -th amino acid  
286 of this residue,  $N$  denotes the total number of all possible amino acids ( $N = 20$ ), and  $count_n$   
287 denotes total number of the  $n$ -th amino acid of this residue.

288  
289 By comprehensively considering commercial DNA fragment sizes and prices and distribution of  
290 the conserved regions in the HA/NA sequences, we proposed an optimized fragment design that  
291 divides HA into 4 fragments and NA into 3 fragments. Length of joint regions was set to 9 amino  
292 acids (27bp in nucleotides) because Gibson Clone Assembly requires at least 25bp joint region  
293 length. Joint regions of group 1 HA were set at 123–131, 264–272, and 403–411 (CDS position  
294 on a A/California/7/2009[H1N1] HA). Joint regions of group 2 HA were set at 123–131, 265–273,  
295 and 403–411 (CDS position on a A/Aichi/2/1968[H3N2] HA). Joint regions of NA were set at  
296 131–139 and 292–301 (for each subtype, all positions are subject to CDS position on a  
297 representative template of this subtype). Joint regions and templates of all HA and NA subtypes  
298 are shown in Table S1. Furthermore, to maximize the compatibility of joint regions, Librator  
299 revised all nucleotide sequences of joint regions by translating them from peptide sequences using  
300 a dictionary in which each amino acid only has one corresponding codon.

### 301 302 **Pipeline design**

303 To optimize the user experience, especially for biologists without a computer science background  
304 and not familiar with command-line tools, we developed a highly interactive GUI for Librator.  
305 Function calling, parameter setting and information display were integrated into one main interface  
306 with multiple tabs. All functions can be divided into two broad categories: basic function and  
307 advanced function. Basic function includes Input/output (I/O) operations and database (DB)  
308 operations: parameter setting, create new sequence DB, open existing sequence DB, import  
309 sequences and export sequences. Advanced function inGUI includes sequence design/editing,  
310 fragment design, phylogenetic analysis and structure visualization: the specific functions are  
311 sequence information editing, HA numbering, mutation identification, antigen probe design,  
312 multiple sequence alignment, phylogenetic analysis, sequence editing, chimeric HA design,  
313 structure visualization and Gibson Clone fragments design (Figure S4).

314

### 315 **Multiple HA numbering schemes in Influenza research field**

316 As discussed in the introduction section, there are three different numbering systems commonly  
317 used in the Influenza research field: 1) CDS position, 2) crystal-structure-based H1/H3 numbering,  
318 and 3) Burke and Smith HA numbering scheme.

319  
320 Residue number on CDS is usually counted from the first amino acid of the CDS (Methionine).  
321 For a given sequence, CDS position can cover all residues of given sequence regardless of sporadic  
322 insertion and/or deletion. The crystal-structure-based H1/H3 numbering aligns given sequences  
323 against a classic H1/H3 template and assigns position numbers for all residues that can map to the  
324 template crystal structures. Thus, inserted residues and non-structural residues (e.g. signal peptides)  
325 will not be assigned a residue number because they cannot be aligned to the template crystal  
326 structures. Furthermore, numbers of residues in HA1 and HA2 are counted independently. The  
327 Burke and Smith HA numbering scheme proposed by Burke et al. aligns given sequences against  
328 26 templates of different subtypes to determine the residue numbers. Different from the structure-  
329 based HA numbering scheme, the Burke and Smith HA numbering scheme is based on amino acid  
330 sequences without considering structural information, and it counts from the first amino acid of  
331 the CDS after signal peptide removal. This numbering scheme has been implemented by FLUDB  
332 (<https://www.fludb.org/brc/haNumbering.spg?method=ShowCleanInputPage&decorator=influenza>)  
333 recently. We compared three different HA numbering systems using H1 and H3 template  
334 sequences (Figure S5; Table S3, S4).

335  
336 Because protein structures play an important role in antigen phenotypes, all functions in Librator,  
337 including alignment viewer, sequence editing and sequence designing were based on structure-  
338 based HA numbering systems. Users can only access the universal HA numbering scheme in the  
339 “Burke and Smith HA numbering” viewer.

340

### 341 **Antigen probe design**

342 The antigen probe design function makes HA probes for a given HA sequence by generating a  
343 “Y98F” mutation (H3 numbering) and replacing the flexible linker and transmembrane region with  
344 Trimerization-Avitag-H6 sequence. Residue 98 under H3 numbering is located by the built-in HA  
345 numbering aligner system automatically. The transmembrane region is identified by aligning given  
346 sequences to an H3 template. This function is not available for most H16 HAs and all H17 and  
347 H18 HAs because these sequences are isolated from avian and bat sources, and their residue 98  
348 under H3 numbering is already “F.”

349

### 350 **Identification of key residues between two groups of sequences**

351 In this function, first we align all sequences from both groups together; then we investigate  
352 peptide differences between the two groups for every residue independently. For each residue,  
353 we convert amino acid composition of two groups into numerical amino acid vectors:

$$354 \quad V = \{N_{AA_1}, N_{AA_2}, \dots, N_{AA_{21}}\} / \sum N_{AA_i}$$

355  $AA_i$  denotes the  $i$ -th amino acid of a total of 21 different amino acid options (20 amino acids + any  
356 symbol beside those 20 AAs, e.g. alignment gap or unclear amino acid X).  $N_{AA_i}$  denotes the total  
357 number of appearances of the  $i$ -th amino acid. Then we defined a score to represent the difference  
358 in amino acid composition between two groups on a specific residue:

$$359 \quad \text{Score}_j = |V_{pos_j} - V_{neg_j}|^2$$



360  $V_{pos_j}$  and  $V_{neg_j}$  denote amino acid vectors of residue  $j$ .  $Score_j$  denotes peptide difference of  
361 residue  $j$ .

362 Under this scoring system, score = 0 indicates no peptide difference on this residue between two  
363 groups. The higher the score is, the bigger the peptide difference will be. Then all residues will be  
364 ranked by the score from high to low to facilitate users' further analysis. In summary, this function  
365 gives suggestions of key residues to narrow the candidate range and accelerate biological studies.  
366

### 367 *Nomenclature of Gibson Clone fragments*

368 Users can save resources and reagents by reusing standardized fragments generated by Librator.  
369 We defined a nomenclature for all fragments for easier inventory management. Each fragment  
370 name is composed of three parts: gene segment subtype (H1–H18, N1–N11), fragment number  
371 (F1–F4 for HA, F1–F3 for NA) and a unique numerical ID. For example, H3-F1-0001 denotes a  
372 gene fragment at position 1 (first fragment) generated from an H3 sequence with an ID 0001. We  
373 designed a SQL table for Librator for inventory management of all gene fragments. There are 9  
374 keys in the fragment table: Name (prime key), Segment (HA/NA), Fragment (F1–F4), Subtype,  
375 ID, Template (template sequence name), AAseq (amino acid sequence), NTseq (nucleotide  
376 sequence), and Instock (yes/no). We also designed an interface for users to manage their fragment  
377 inventory.  
378

### 379 *Implementation*

380 The pipeline was primarily implemented in Python3 (version 3.7.3 for MacOS, version 3.9 for  
381 Windows 10) using PyQt5 library (version 5.13.0). The executable application was compiled from  
382 source code using Pyinstaller (version 4, <https://www.pyinstaller.org/>). JQuery JavaScript library  
383 (version 3.4.1, <https://jquery.com/>), pyecharts library (version 1.8.1, <https://pyecharts.org/>) and  
384 matplotlib library (version 3.1.1, <https://matplotlib.org/>) were used to generate figures and  
385 integrative HTML sequence viewers. Local databases were generated by sqlite3  
386 (<https://docs.python.org/3/library/sqlite3.html>), a Python version of SQLite (version 3.33.0,  
387 <https://www.sqlite.org/>); remote databases were generated by MySQL (version 8.0,  
388 <https://www.mysql.com/>). The entire project was developed using PyCharm CE community  
389 (version 2019.2, <https://www.jetbrains.com/pycharm/>) integrated development environment. We  
390 integrated two sequence aligners MUSCLE (version 3.8.31, <https://www.drive5.com/muscle/>) and  
391 Clustal Omega (version 1.2.3, <http://www.clustal.org/omega/>) for multiple sequence alignment,  
392 H1/H3 numbering alignment, fragment alignment and mutation identification<sup>38, 39</sup>. We also  
393 implemented an interface for users to visualize their sequences on 3D structures using PyMOL  
394 (version 2.3.2, <https://pymol.org/>) and UCSF Chimera (<https://www.cgl.ucsf.edu/chimera/>), to  
395 generate a maximum-likelihood tree using RAxML (version 8.0.0, <https://raxml-ng.vital-it.ch/>),  
396 and to visualize a phylogenetic tree using phylotree.js library (<http://phylotree.hyphy.org/>)<sup>21, 22, 40</sup>.  
397 Sequence logos of selected sequences were generated by WebLogo (version 3.7.1,  
398 <https://weblogo.berkeley.edu/>)<sup>20</sup>. Landscape of multiple sequence alignment is generated by  
399 html2canvas (<https://html2canvas.hertzen.com/>) and Python3. The codon optimization functions  
400 is powered by DNA Chisel (version 3.2.6, <https://github.com/Edinburgh-Genome-Foundry/DnaChisel>). The crystal-structure-based HA numbering system is adopted from a public  
401 repository ([https://github.com/bloomlab/HA\\_numbering](https://github.com/bloomlab/HA_numbering)) with some modifications.  
402  
403

#### 404 **Software and code availability**

405 Librator is freely hosted online (<https://wilsonimmunologylab.github.io/Librator/>). Tutorials are  
406 available from a Wilson Lab GitHub page (<https://wilsonimmunologylab.github.io/Librator/>), a  
407 pdf format user guide is also available for downloading. The source code is also available from  
408 GitHub (<https://github.com/WilsonImmunologyLab/Librator>).

409  
410 We provide executable version of this software for two dominated operating systems: Windows  
411 10 and MacOS. The MacOS version of this software is compiled under macOS Mojave (version  
412 10.14.6) and has been tested under macOS Mojave (version 10.14.6), macOS Catalina (version  
413 10.15.2) and macOS Big Sur (version 11.2.3). The Windows 10 version of this software is  
414 compiled under Windows 10 Home (OS build 19042.867) and has been tested under the same  
415 system.

416  
417 This Python-based software is also transferable and can be compiled under other systems (e.g.  
418 ubuntu) from source code.

419

#### 420 **Acknowledgements**

421 We would like to thank Dr. Jesse Bloom for his assistance and suggestions for this project.

422

#### 423 **FUNDING**

424 This project was funded in part by the National Institute of Allergy and Infectious Disease (NIAID);  
425 National Institutes of Health (NIH) grant numbers U19AI082724 (P.C.W.), U19AI109946  
426 (P.C.W.), U19AI057266 (P.C.W.), and the NIAID Centers of Excellence for Influenza Research  
427 and Surveillance (CEIRS) grant numbers HHSN272201400005C (P.C.W.).

428

#### 429 **Author Contributions**

430 L.L. designed the model, implemented the software, performed computational analyses,  
431 and wrote the manuscript. O.S., J.J.G., S.C. and Y.F. tested software, improved software  
432 design, and revised the manuscript. H.L.D. and C.T.S. tested software and improved  
433 software design. N.Z. and M.H. performed experimental validations. P.C.W. initiated and  
434 supervised the work, designed the model, implemented the software, and wrote the  
435 manuscript.

436

#### 437 **Competing Interests**

438 The authors declare no competing interests.

439

#### 440 **References**

441

442

- 443 1. Koel, B.F. et al. Substitutions near the receptor binding site determine major antigenic  
444 change during influenza virus evolution. *Science* **342**, 976-979 (2013).
- 445 2. Sun, W. et al. Development of influenza B universal vaccine candidates using the  
446 “Mosaic” hemagglutinin approach. *Journal of virology* **93** (2019).

- 447 3. Krammer, F. & Palese, P. Universal influenza virus vaccines that target the conserved  
448 hemagglutinin stalk and conserved sites in the head domain. *The Journal of infectious*  
449 *diseases* **219**, S62-S67 (2019).
- 450 4. Carter, D.M. et al. Design and characterization of a computationally optimized broadly  
451 reactive hemagglutinin vaccine for H1N1 influenza viruses. *Journal of virology* **90**, 4720-  
452 4734 (2016).
- 453 5. Gibson, D.G. et al. Enzymatic assembly of DNA molecules up to several hundred  
454 kilobases. *Nature methods* **6**, 343-345 (2009).
- 455 6. Burney, L.E. Influenza immunization: statement. *Public health reports* **75**, 944 (1960).
- 456 7. Flannery, B. et al. Interim estimates of 2017–18 seasonal influenza vaccine  
457 effectiveness—United States, February 2018. *Morbidity and Mortality Weekly Report* **67**,  
458 180 (2018).
- 459 8. Xie, H. et al. H3N2 mismatch of 2014–15 northern hemisphere influenza vaccines and  
460 head-to-head comparison between human and ferret antisera derived antigenic maps.  
461 *Scientific reports* **5**, 1-10 (2015).
- 462 9. Chiu, C. et al. Cross-reactive humoral responses to influenza and their implications for a  
463 universal vaccine. *Annals of the New York Academy of Sciences* **1283**, 13-21 (2013).
- 464 10. Hagan, T. et al. Antibiotics-driven gut microbiome perturbation alters immunity to  
465 vaccines in humans. *Cell* **178**, 1313-1328. e1313 (2019).
- 466 11. Henry, C. et al. Monoclonal Antibody Responses after Recombinant Hemagglutinin  
467 Vaccine versus Subunit Inactivated Influenza Virus Vaccine: a Comparative Study.  
468 *Journal of Virology* **93**, e01150-01119 (2019).
- 469 12. Staneková, Z. & Varečková, E. Conserved epitopes of influenza A virus inducing  
470 protective immunity and their prospects for universal vaccine development. *Virology*  
471 *journal* **7**, 1-13 (2010).
- 472 13. Burke, D.F. & Smith, D.J. A recommended numbering scheme for influenza A HA  
473 subtypes. *PloS one* **9** (2014).
- 474 14. Kirkpatrick, E., Qiu, X., Wilson, P.C., Bahl, J. & Krammer, F. The influenza virus  
475 hemagglutinin head evolves faster than the stalk domain. *Scientific reports* **8**, 1-14  
476 (2018).
- 477 15. Deem, M.W. & Pan, K. The epitope regions of H1-subtype influenza A, with application  
478 to vaccine efficacy. *Protein Engineering, Design & Selection* **22**, 543-546 (2009).
- 479 16. Hai, R. et al. Influenza viruses expressing chimeric hemagglutinins: globular head and  
480 stalk domains derived from different subtypes. *Journal of virology* **86**, 5774-5781 (2012).
- 481 17. Steel, J. et al. Influenza virus vaccine based on the conserved hemagglutinin stalk  
482 domain. *MBio* **1** (2010).
- 483 18. Medina, R.A. et al. Glycosylations in the globular head of the hemagglutinin protein  
484 modulate the virulence and antigenic properties of the H1N1 influenza viruses. *Science*  
485 *translational medicine* **5**, 187ra170-187ra170 (2013).
- 486 19. Li, L. et al. Multi-task learning sparse group lasso: a method for quantifying antigenicity  
487 of influenza A (H1N1) virus using mutations and variations in glycosylation of  
488 Hemagglutinin. *BMC bioinformatics* **21**, 1-22 (2020).
- 489 20. Crooks, G.E., Hon, G., Chandonia, J.-M. & Brenner, S.E. WebLogo: a sequence logo  
490 generator. *Genome research* **14**, 1188-1190 (2004).
- 491 21. Schrödinger, L. The PyMOL Molecular Graphics System, Version 2.0 Schrödinger, LLC  
492 (2017). *Google Scholar There is no corresponding record for this reference.*

- 493 22. Pettersen, E.F. et al. UCSF Chimera—a visualization system for exploratory research and  
494 analysis. *Journal of computational chemistry* **25**, 1605-1612 (2004).
- 495 23. Abola, E.E., Bernstein, F.C. & Koetzle, T.F. in *Neutrons in Biology* 441-441 (Springer,  
496 1984).
- 497 24. Weis, W.I., Brunger, A.T., Skehel, J.J. & Wiley, D.C. Refinement of the influenza virus  
498 hemagglutinin by simulated annealing. *J Mol Biol* **212**, 737-761 (1990).
- 499 25. Zhang, W. et al. Molecular basis of the receptor binding specificity switch of the  
500 hemagglutinins from both the 1918 and 2009 pandemic influenza A viruses by a D225G  
501 substitution. *J Virol* **87**, 5949-5958 (2013).
- 502 26. McDonald, N.J., Smith, C.B. & Cox, N.J. Antigenic drift in the evolution of H1N1  
503 influenza A viruses resulting from deletion of a single amino acid in the haemagglutinin  
504 gene. *Journal of General Virology* **88**, 3209-3213 (2007).
- 505 27. Benton, D.J. et al. Influenza hemagglutinin membrane anchor. *Proceedings of the  
506 National Academy of Sciences* **115**, 10112-10117 (2018).
- 507 28. Whittle, J.R. et al. Flow cytometry reveals that H5N1 vaccination elicits cross-reactive  
508 stem-directed antibodies from multiple Ig heavy-chain lineages. *J Virol* **88**, 4047-4057  
509 (2014).
- 510 29. Setliff, I. et al. High-Throughput Mapping of B Cell Receptor Sequences to Antigen  
511 Specificity. *Cell* **179**, 1636-1646 e1615 (2019).
- 512 30. Harvey, W.T. et al. Identification of low-and high-impact hemagglutinin amino acid  
513 substitutions that drive antigenic drift of influenza A (H1N1) viruses. *PLoS pathogens* **12**  
514 (2016).
- 515 31. Li, L., DeLiberto, T.J., Killian, M.L., Torchetti, M.K. & Wan, X.-F. Evolutionary  
516 pathway for the 2017 emergence of a novel highly pathogenic avian influenza A (H7N9)  
517 virus among domestic poultry in Tennessee, United States. *Virology* **525**, 32-39 (2018).
- 518 32. Krammer, F., Li, L. & Wilson, P.C. Emerging from the Shadow of Hemagglutinin:  
519 Neuraminidase Is an Important Target for Influenza Vaccination. *Cell Host & Microbe*  
520 **26**, 712-713 (2019).
- 521 33. Zhu, X. et al. Structural basis of protection against H7N9 influenza virus by human anti-  
522 N9 neuraminidase antibodies. *Cell host & microbe* **26**, 729-738. e724 (2019).
- 523 34. Gilchuk, I.M. et al. Influenza H7N9 virus neuraminidase-specific human monoclonal  
524 antibodies inhibit viral egress and protect from lethal influenza infection in mice. *Cell  
525 host & microbe* **26**, 715-728. e718 (2019).
- 526 35. Chen, Y.-Q. et al. Influenza infection in humans induces broadly cross-reactive and  
527 protective neuraminidase-reactive antibodies. *Cell* **173**, 417-429. e410 (2018).
- 528 36. Bao, Y. et al. The influenza virus resource at the National Center for Biotechnology  
529 Information. *Journal of virology* **82**, 596-601 (2008).
- 530 37. Bogner, P., Capua, I., Lipman, D.J. & Cox, N.J. A global initiative on sharing avian flu  
531 data. *Nature* **442**, 981-981 (2006).
- 532 38. Edgar, R.C. MUSCLE: multiple sequence alignment with high accuracy and high  
533 throughput. *Nucleic acids research* **32**, 1792-1797 (2004).
- 534 39. Sievers, F. et al. Fast, scalable generation of high-quality protein multiple sequence  
535 alignments using Clustal Omega. *Molecular systems biology* **7** (2011).
- 536 40. Stamatakis, A. RAxML version 8: a tool for phylogenetic analysis and post-analysis of  
537 large phylogenies. *Bioinformatics* **30**, 1312-1313 (2014).
- 538



## FIGURES

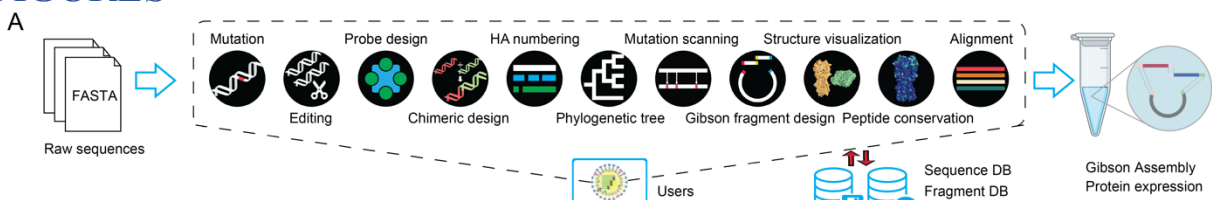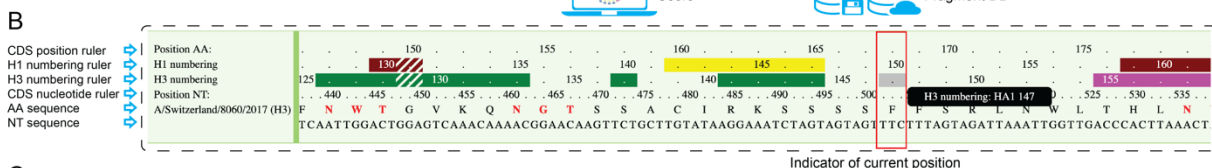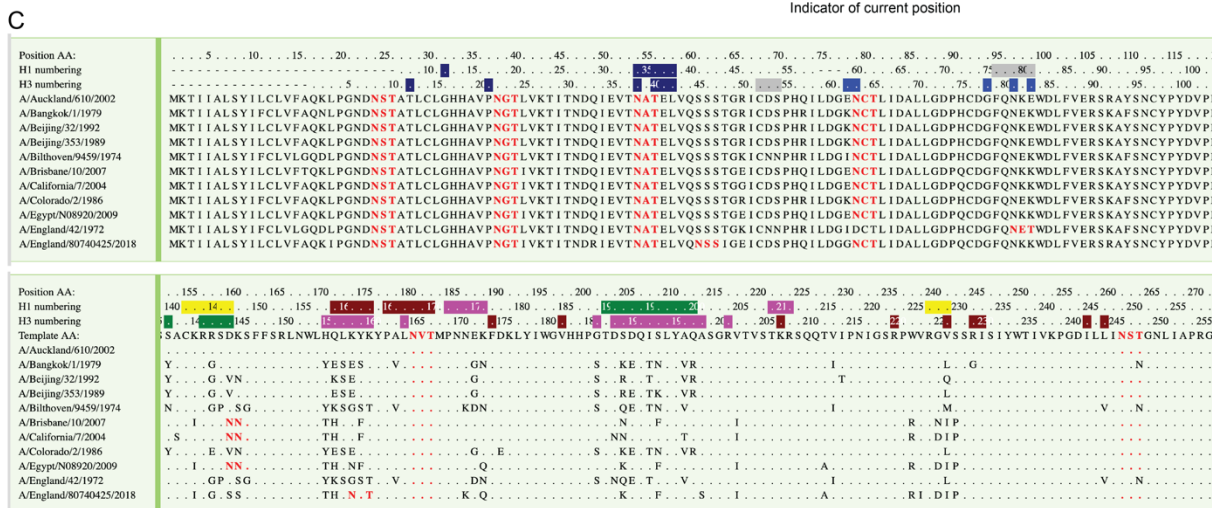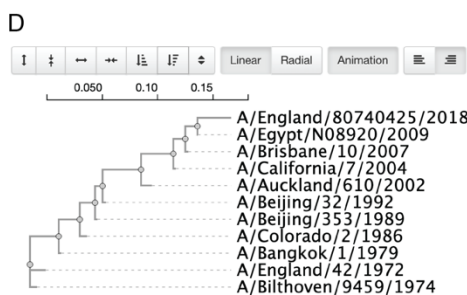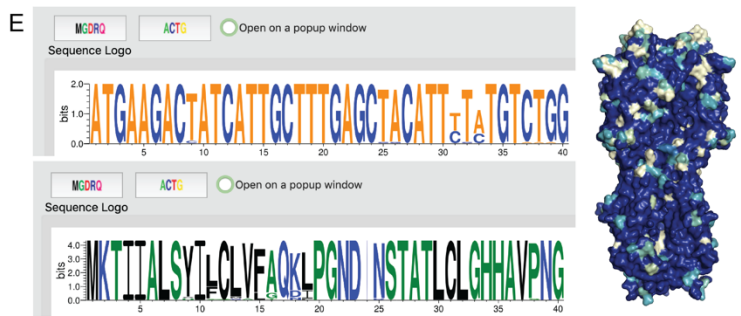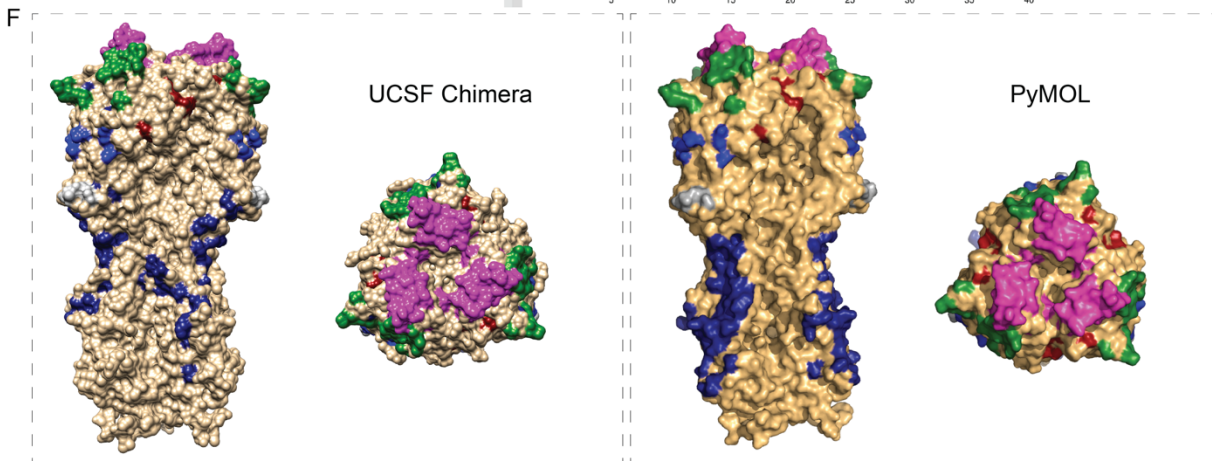



**Figure 1.** Librator enables efficient analysis of HA and NA influenza virus protein sequences with a variety of functions and a graphical user interface. **(A)** Librator seamlessly connects nucleotide sequences from public databases and lab work, providing a variety of functions for sequence editing and design. **(B)** Librator's HA numbering aligner is integrated in a graphical viewer. Three numbering rulers—a CDS position ruler, H1 numbering ruler and H3 numbering ruler—indicate position information for selected residues. **(C)** Multiple sequence alignment viewer. Original sequence mode is displayed on the top, and template mode is displayed on the bottom. **(D)** Phylogenetic analysis function and tree viewer. Users are allowed to generate phylogenetic trees using either nucleotide sequences or peptide sequences. **(E)** Librator allows users to assess nucleotide conservation and peptide conservation. Librator also can visualize the peptide conservation on HA 3D structures with the help of PyMOL and USCF Chimera. **(F)** Librator allows users to visualize peptides on 3D structures of HA proteins with color-annotated amino acids at all antigenic regions and user-defined sequence labels with the help of PyMOL and USCF Chimera.

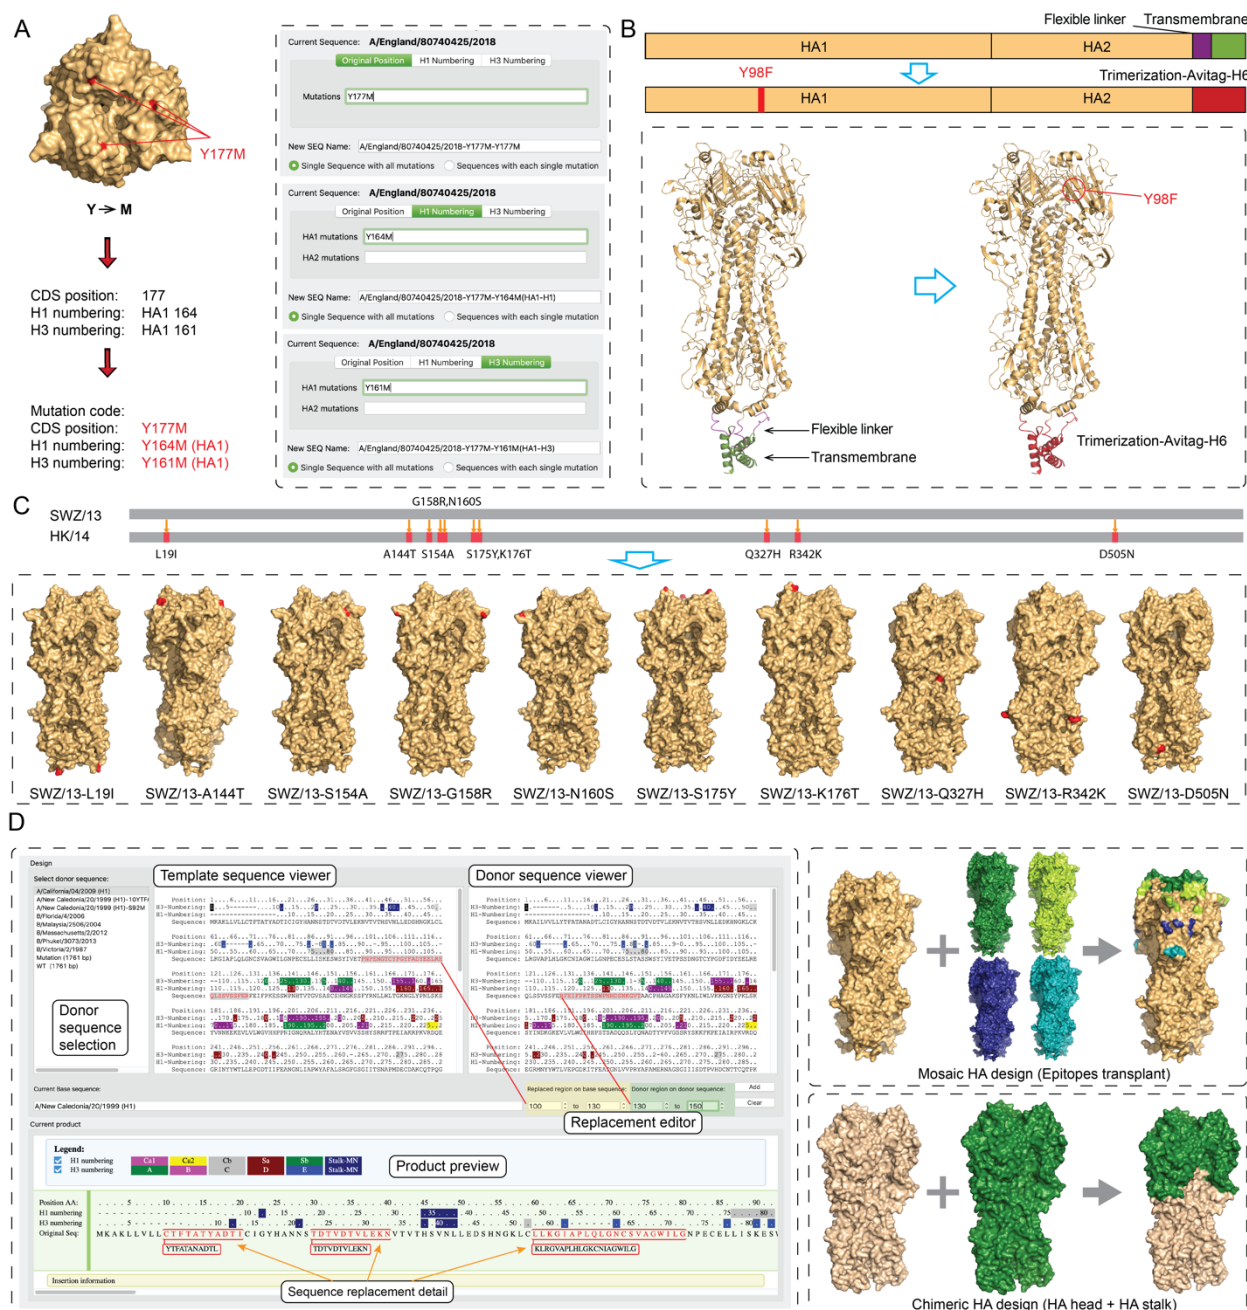

**Figure 2.** Librator enables efficient design of HA and NA influenza virus proteins. **(A)** Demonstration of mutating a residue on an HA sequence using three numbering systems in Librator. **(B)** Making an antigen probe for a given HA sequence. Librator designs antigen probes for given HA sequences by generating the mutation Y98F (H3 numbering) and replacing the flexible linker and transmembrane region with a Trimerization-Avitag-H6 sequence. This process is demonstrated using an HA structure of A/duck/Alberta/35/76 (H1N1, PDB ID: 6HJR). **(C)** Scanning all amino acid differences between two antigenically distinct sequences (A/Switzerland/9715293/2013 [SWZ/13] and A/HongKong/4801/2014 [HK/14]) with Librator generates a series of sequences, each with a single mutation, to identify key residues of the antigenic drift. **(D)** Designing chimeric sequences using Librator. Users can replace regions on the target sequence with regions from multiple donor sequences. Details of the product can be previewed on a graphical viewer. This function is designed to transplant epitopes from one sequence (or multiple sequences) to another or to combine the HA1 (HA head) from one sequence and HA2 (HA stalk) from another.

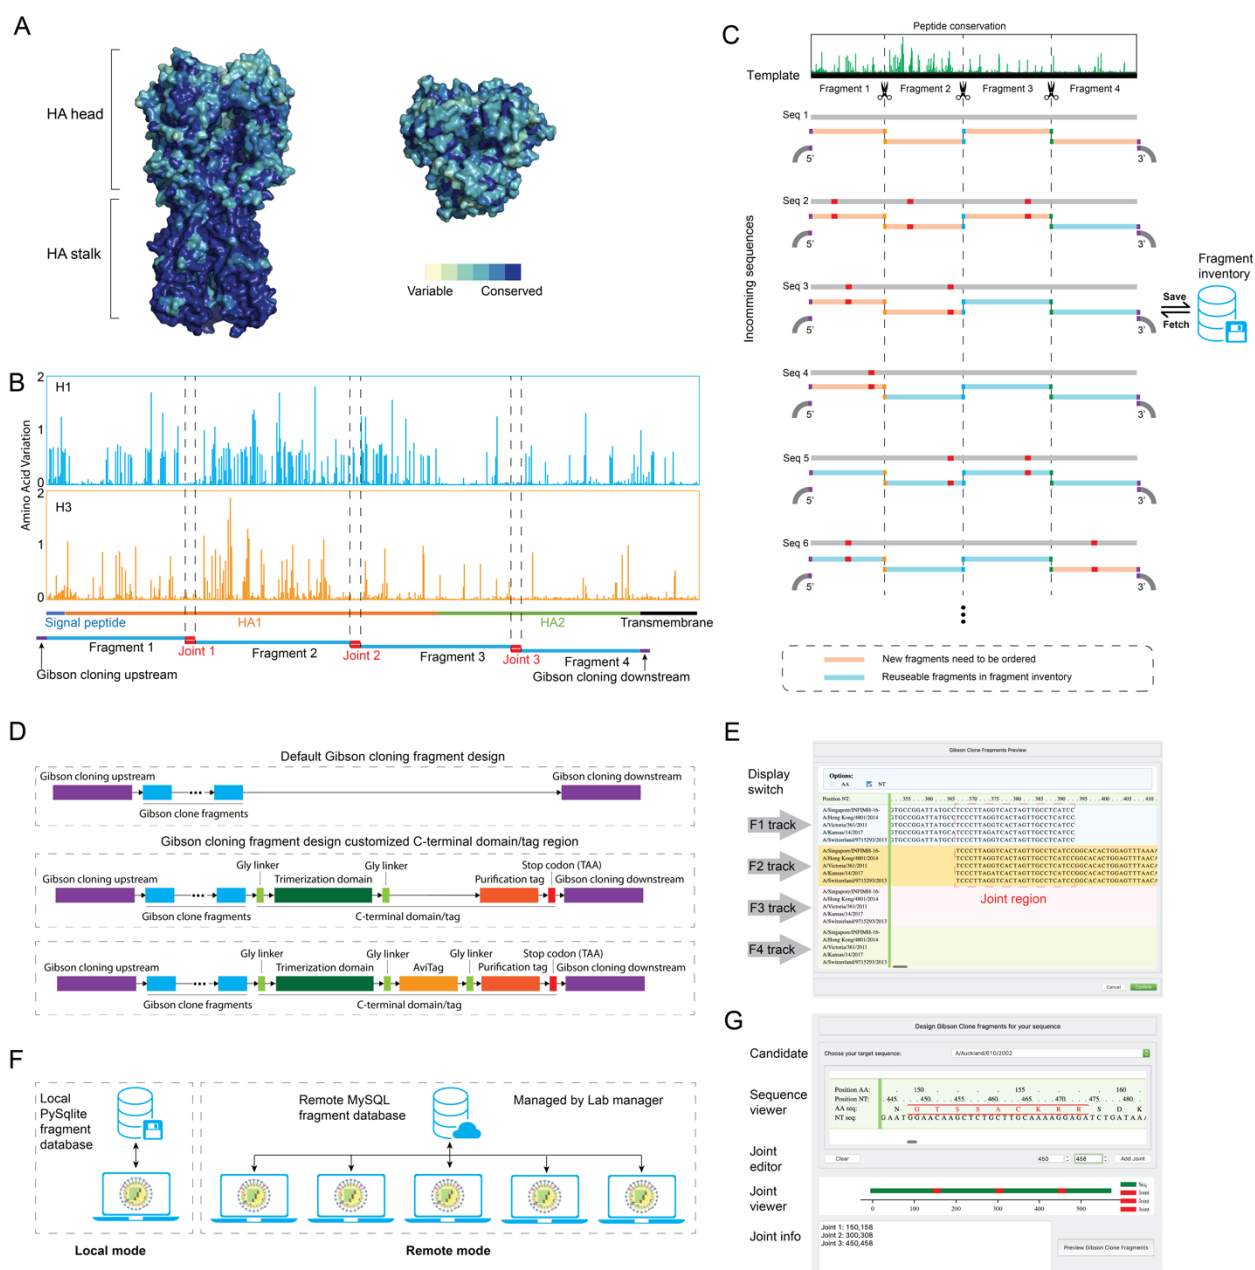

**Figure 3.** Librator helps users to save reagent cost by designing optimized Gibson Clone fragments for HA and NA sequences. **(A)** Natural mutations on HA protein are enriched in a few highly variable regions. Peptide conservation was visualized on a H1 protein structure (A/California/04/2009 H1N1, PDB ID: 4JTV). Peptide conservation was calculated from HAs of 58 representative H1N1 viruses from 1918 – 2018. **(B)** Illustration of fragment designs for a group 1 HA (based on a H1 template) and a group 2 HA (based on a H3 template) in Librator. Joint regions were determined by locating highly conserved regions on H1/H3 peptides and balancing the length of each fragment. **(C)** Librator determines overlapping regions based on peptide conservation of all historical HA and NA sequences, and then defines fragment design on a template sequence for each subtype. For each given sequence, Librator aligns it to its template sequence to maximize the reusability and compatibility of gene fragments. All fragments are saved in a fragment inventory for further inquiry. Librator aims to save reagent cost by reusing gene fragments. **(D)** Three modes of customizing the C-terminal domain/tag region for the Gibson cloning downstream end. Beside the default mode that directly links the last fragment and the Gibson cloning downstream sequence, we also designed a customizable C-terminal domain/tag region for HA proteins: Trimerization domain + Purification tag (e.g. 6xHisTag) or Trimerization domain + AviTag + Purification tag. **(E)** Graphical viewer of fragments for users to preview their products. **(F)** Librator users can communicate with a local fragment database or a remote fragment database managed

by their lab manager. The remote mode enables better data access and lab reagent stock management. **(G)** Customized fragment design function for any given sequence. This function allows users to add at most 12 joint regions in their sequences and split their sequences into a few fragments for Gibson Assembly. This function was designed for non-influenza sequences or novel research in which reusability is not a priority.

## SUPPLEMENTAL FIGURES

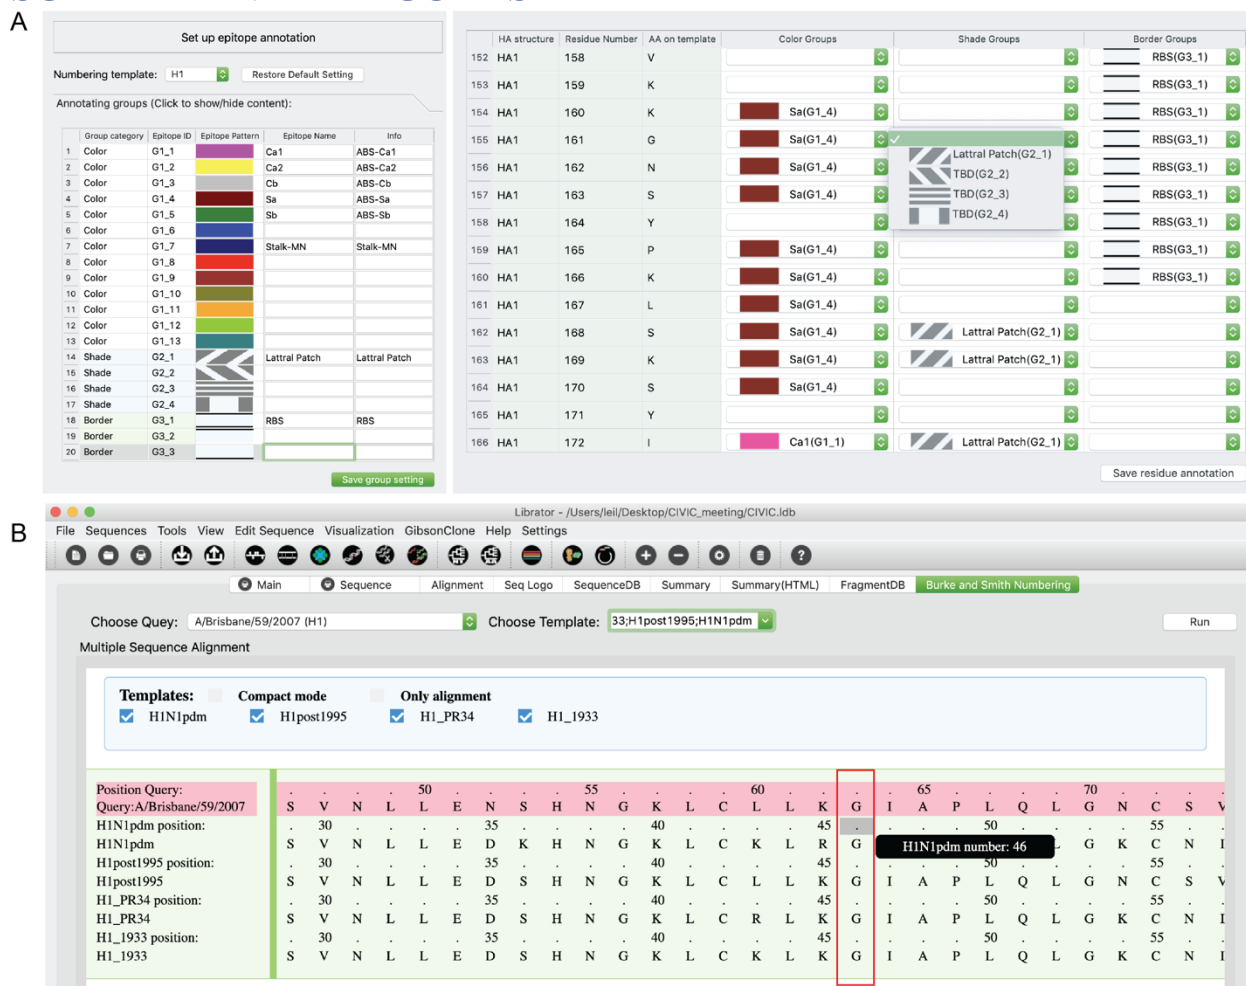

**Figure S1.** Built-in functions of Librator for influenza sequence analysis. **(A)** User customizable epitopes definition in Librator. Librator allows users to use 13 distinct colors, 4 shade patterns and 3 border styles to annotate individual residues on the sequence viewer according to their specific research interest and focus. The left panel showed GUI of defining epitopes in Librator, and the right panel showed GUI of annotating individual residues using user-defined epitopes. **(B)** Burke and Smith HA numbering scheme viewer in Librator. Users are allowed to align query sequence against multiple templates to access residue numbers on different templates.



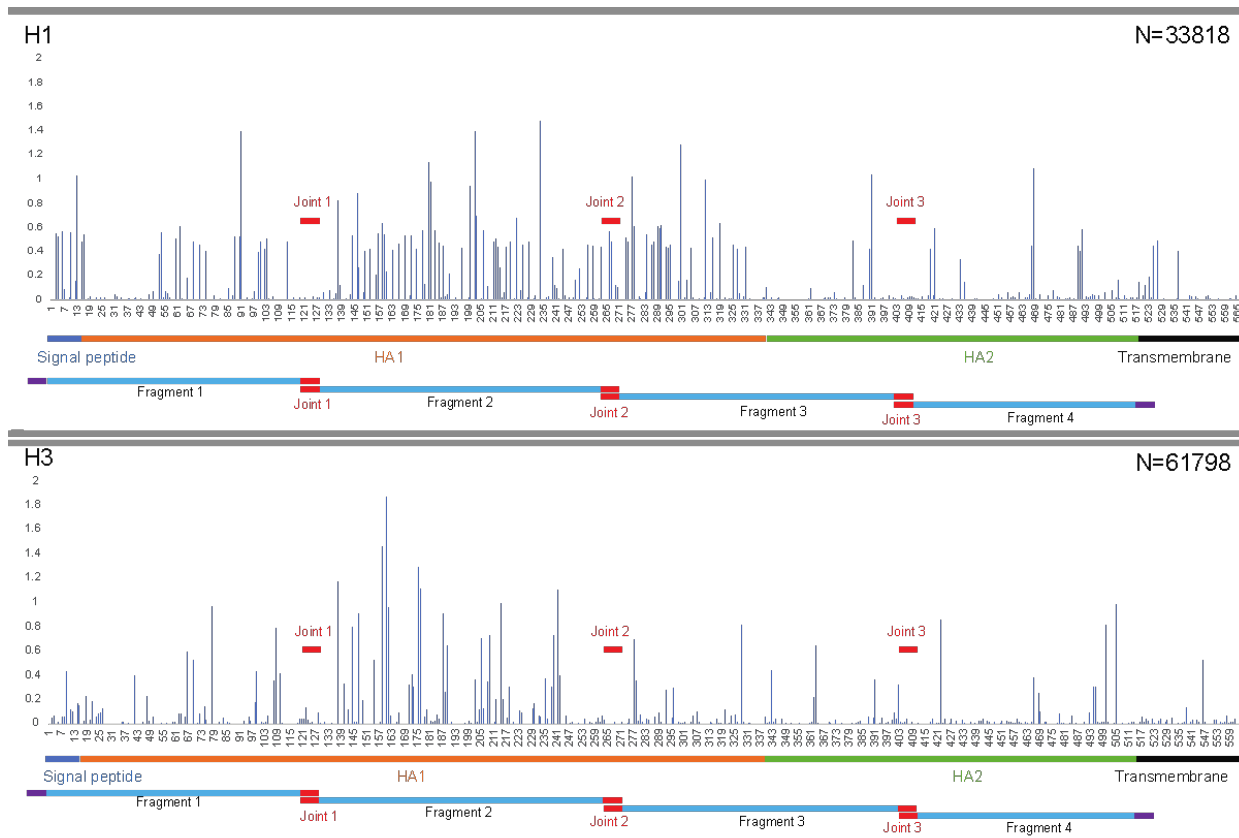

**Figure S2.** Fragment design for influenza HA proteins. HA proteins are clustered into two groups: group 1 and group 2. In Liberator, all group 1 sequences are aligned to an H1 template, and all group 2 sequences are aligned to an H3 template.

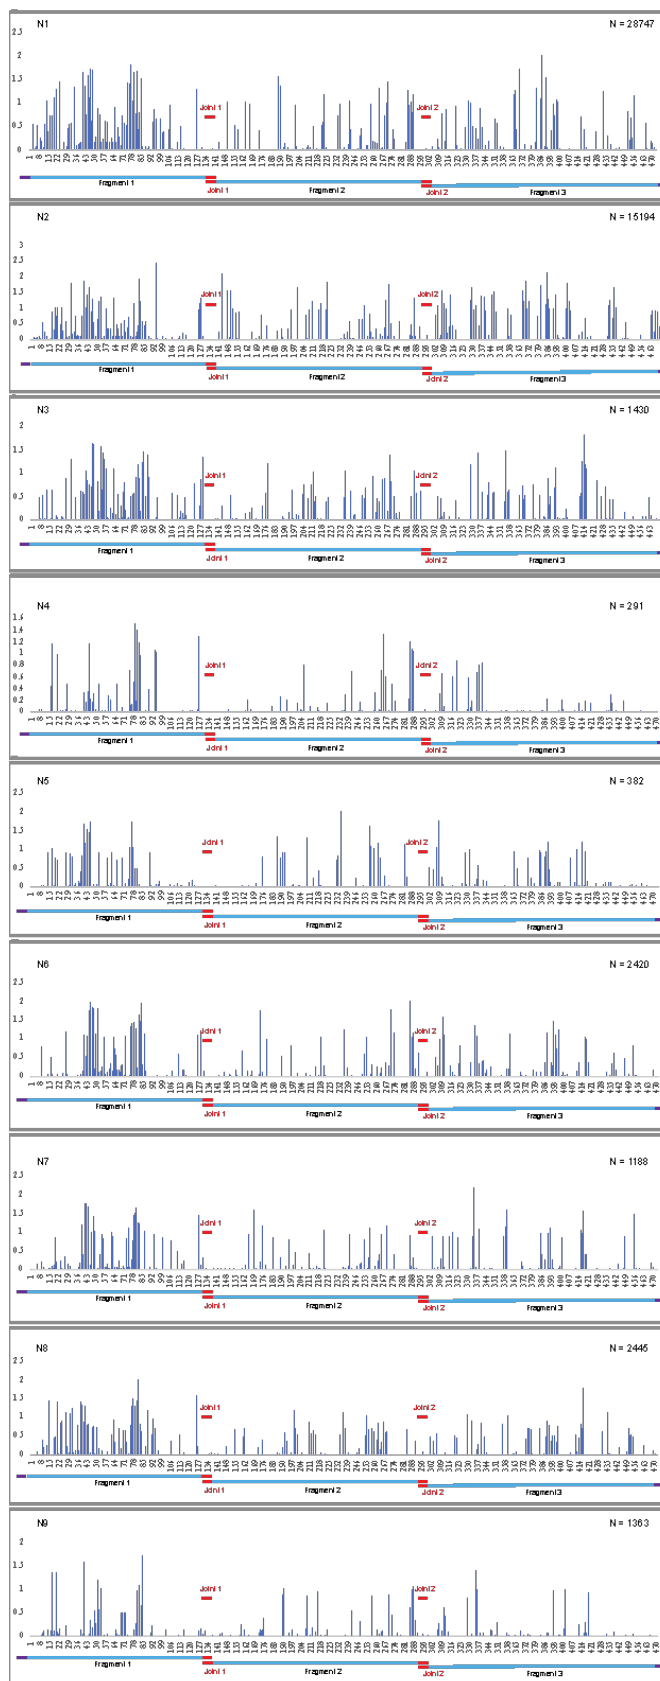

Figure S3. Fragment design for influenza NA proteins.

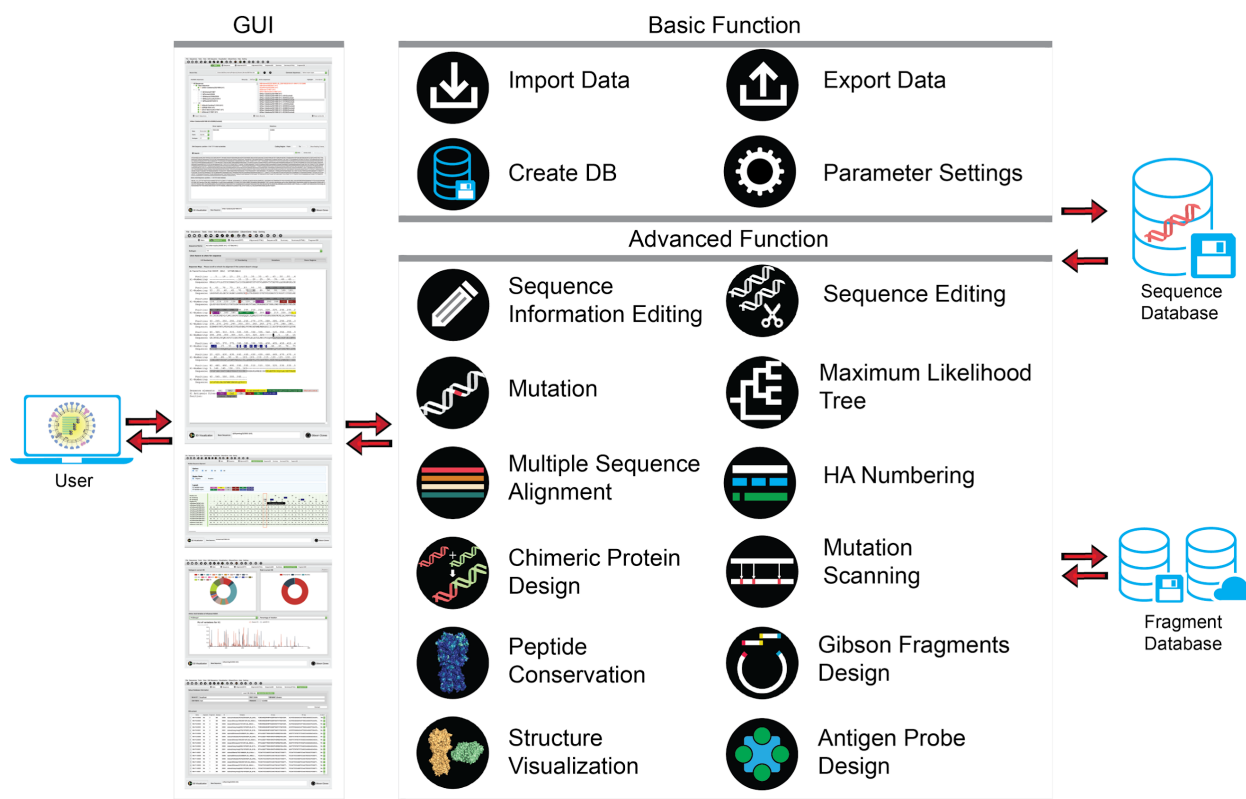

**Figure S4.** System structure and functions of Librator. Librator is comprised of a UI layer (GUI), logical layer (all functions) and data layer (SQL databases). Users are allowed to finish all operations using the GUI. All functions can be divided into two broad categories: basic function and advanced function. Basic function includes I/O operations and database (DB) operations, and advanced function includes sequence design/editing, fragment design, phylogenetic analysis and structure visualization.

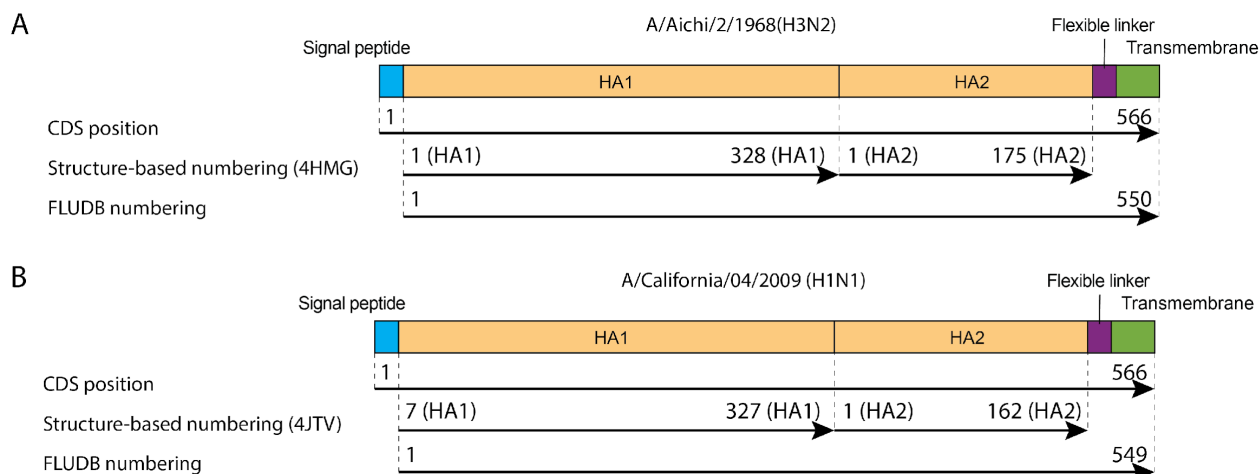

**Figure S5.** Comparison of three different HA numbering systems using a classic H1 (A/California/04/2009, H1N1) and a classic H3 (A/Aichi/2/1968, H3N2) sequence.

## SUPPLEMENTAL TABLES

**Table S1.** Template sequences and joint region design of HA and NA sequences in Librator.

| Protein | Subtype   | Template                                                         | Joint 1<br>*** | Joint 2<br>*** | Joint 3<br>*** |
|---------|-----------|------------------------------------------------------------------|----------------|----------------|----------------|
| HA      | Group 1*  | A/California/04/2009 H1N1                                        | 123-131        | 264-272        | 403-411        |
|         | Group 2** | A/Aichi/2/1968 H3N2                                              | 123-131        | 265-273        | 403-411        |
| NA      | N1        | A/California/04/2009 QEH91764                                    | 131-139        | 292-300        |                |
|         | N2        | A/Texas/08/2019 QBP39026                                         | 131-139        | 292-300        |                |
|         | N3        | A/mallard/Maryland/13OS3019/2014 AKF18550                        | 131-139        | 292-300        |                |
|         | N4        | A/mallard/Utah/AH0020452/2015 AQS26331                           | 131-139        | 292-300        |                |
|         | N5        | A/commonredshank/Singapore/F83-1/2015 ALR83194                   | 131-139        | 292-300        |                |
|         | N6        | A/duck/Guangdong/G1345/2014 AJS16549                             | 131-139        | 292-300        |                |
|         | N7        | A/mallard/Sweden/124987/2010 AHZ37263                            | 131-139        | 292-300        |                |
|         | N8        | A/northernpintail/Alaska/UGA115-7291/2015 AOX49352               | 131-139        | 292-300        |                |
|         | N9        | A/green-winged-teal/Ohio/14OS1103/2014 AMQ30738                  | 131-139        | 292-300        |                |
|         | N10       | A/little-yellow-shouldered-bat/Guatemala/060/2010 EPI_ISL_105896 | 131-139        | 292-300        |                |
|         | N11       | A/flat-faced-bat/Peru/033/2010 AGX84936                          | 131-139        | 292-300        |                |

\* Group 1 HAs include H1, H2, H5, H6, H8, H9, H11, H12, H13, H16, H17, and H18

\*\* Group 2 HAs include H3, H4, H7, H10, H14, and H15

\*\*\* Numbering counts from first amino acid (M) of CDS of H1/H3 template sequence

**Table S2.** Fragment design for Group 1 HA and Group 2 HA protein sequences.

| Subtype      | Fragment   | Start* | End* | Length (AA) | Length (NT) | Antigenic sites  |
|--------------|------------|--------|------|-------------|-------------|------------------|
| Group 1 (H1) | Fragment 1 | 1      | 131  | 131         | 393         | Cb, Sb, Stalk-MN |
|              | Fragment 2 | 123    | 272  | 150         | 450         | Ca1, Ca2, Sa     |
|              | Fragment 3 | 264    | 411  | 148         | 444         | Cb, Stalk-MN     |
|              | Fragment 4 | 403    | 518  | 116         | 348         | Stalk-MN         |
| Group 2 (H3) | Fragment 1 | 1      | 131  | 131         | 393         | C, E, Stalk-MN   |
|              | Fragment 2 | 123    | 273  | 151         | 453         | A, B, D          |
|              | Fragment 3 | 265    | 411  | 147         | 441         | C, Stalk-MN      |
|              | Fragment 4 | 403    | 520  | 118         | 354         | Stalk-MN         |

\* Numbering counts from first amino acid (M) of CDS of H1/H3 template sequence

**Table S3.** Comparison of multiple HA numbering schemes using pdm09 H1 template (A/California/04/2009, H1N1). Template for FLU DB numbering is H1N1pdm. Flexible linker and transmembrane domain were located by aligning to A/duck/Alberta/35/76(H1N1), PDB ID: 6HJR.

| position on CDS | FLU DB H1pdm numbering | structure-based H1 numbering (4JTV) | Residue | Annotation     |
|-----------------|------------------------|-------------------------------------|---------|----------------|
| 1               | -                      | -                                   | M       | Signal peptide |
| 2               | -                      | -                                   | K       | Signal peptide |
| 3               | -                      | -                                   | A       | Signal peptide |
| 4               | -                      | -                                   | I       | Signal peptide |
| 5               | -                      | -                                   | L       | Signal peptide |

|    |   |             |   |                |
|----|---|-------------|---|----------------|
| 6  | - | -           | V | Signal peptide |
| 7  | - | -           | V | Signal peptide |
| 8  | - | -           | L | Signal peptide |
| 9  | - | -           | L | Signal peptide |
| 10 | - | -           | Y | Signal peptide |
| 11 | - | -           | T | Signal peptide |
| 12 | - | -           | F | Signal peptide |
| 13 | - | -           | A | Signal peptide |
| 14 | - | -           | T | Signal peptide |
| 15 | - | -           | A | Signal peptide |
| 16 | - | -           | N | Signal peptide |
| 17 | - | -           | A | Signal peptide |
| 18 |   | 1 7 (HA1)   | D | HA1            |
| 19 |   | 2 8 (HA1)   | T | HA1            |
| 20 |   | 3 9 (HA1)   | L | HA1            |
| 21 |   | 4 10 (HA1)  | C | HA1            |
| 22 |   | 5 11 (HA1)  | I | HA1            |
| 23 |   | 6 12 (HA1)  | G | HA1            |
| 24 |   | 7 13 (HA1)  | Y | HA1            |
| 25 |   | 8 14 (HA1)  | H | HA1            |
| 26 |   | 9 15 (HA1)  | A | HA1            |
| 27 |   | 10 16 (HA1) | N | HA1            |
| 28 |   | 11 17 (HA1) | N | HA1            |
| 29 |   | 12 18 (HA1) | S | HA1            |
| 30 |   | 13 19 (HA1) | T | HA1            |
| 31 |   | 14 20 (HA1) | D | HA1            |
| 32 |   | 15 21 (HA1) | T | HA1            |
| 33 |   | 16 22 (HA1) | V | HA1            |
| 34 |   | 17 23 (HA1) | D | HA1            |
| 35 |   | 18 24 (HA1) | T | HA1            |
| 36 |   | 19 25 (HA1) | V | HA1            |
| 37 |   | 20 26 (HA1) | L | HA1            |
| 38 |   | 21 27 (HA1) | E | HA1            |
| 39 |   | 22 28 (HA1) | K | HA1            |
| 40 |   | 23 29 (HA1) | N | HA1            |
| 41 |   | 24 30 (HA1) | V | HA1            |
| 42 |   | 25 31 (HA1) | T | HA1            |
| 43 |   | 26 32 (HA1) | V | HA1            |
| 44 |   | 27 33 (HA1) | T | HA1            |
| 45 |   | 28 34 (HA1) | H | HA1            |



|    |    |          |   |     |
|----|----|----------|---|-----|
| 46 | 29 | 35 (HA1) | S | HA1 |
| 47 | 30 | 36 (HA1) | V | HA1 |
| 48 | 31 | 37 (HA1) | N | HA1 |
| 49 | 32 | 38 (HA1) | L | HA1 |
| 50 | 33 | 39 (HA1) | L | HA1 |
| 51 | 34 | 40 (HA1) | E | HA1 |
| 52 | 35 | 41 (HA1) | D | HA1 |
| 53 | 36 | 42 (HA1) | K | HA1 |
| 54 | 37 | 43 (HA1) | H | HA1 |
| 55 | 38 | 44 (HA1) | N | HA1 |
| 56 | 39 | 45 (HA1) | G | HA1 |
| 57 | 40 | 46 (HA1) | K | HA1 |
| 58 | 41 | 47 (HA1) | L | HA1 |
| 59 | 42 | 48 (HA1) | C | HA1 |
| 60 | 43 | 49 (HA1) | K | HA1 |
| 61 | 44 | 50 (HA1) | L | HA1 |
| 62 | 45 | 51 (HA1) | R | HA1 |
| 63 | 46 | 52 (HA1) | G | HA1 |
| 64 | 47 | 53 (HA1) | V | HA1 |
| 65 | 48 | 54 (HA1) | A | HA1 |
| 66 | 49 | 55 (HA1) | P | HA1 |
| 67 | 50 | 56 (HA1) | L | HA1 |
| 68 | 51 | 57 (HA1) | H | HA1 |
| 69 | 52 | 58 (HA1) | L | HA1 |
| 70 | 53 | 59 (HA1) | G | HA1 |
| 71 | 54 | 60 (HA1) | K | HA1 |
| 72 | 55 | 61 (HA1) | C | HA1 |
| 73 | 56 | 62 (HA1) | N | HA1 |
| 74 | 57 | 63 (HA1) | I | HA1 |
| 75 | 58 | 64 (HA1) | A | HA1 |
| 76 | 59 | 65 (HA1) | G | HA1 |
| 77 | 60 | 66 (HA1) | W | HA1 |
| 78 | 61 | 67 (HA1) | I | HA1 |
| 79 | 62 | 68 (HA1) | L | HA1 |
| 80 | 63 | 69 (HA1) | G | HA1 |
| 81 | 64 | 70 (HA1) | N | HA1 |
| 82 | 65 | 71 (HA1) | P | HA1 |
| 83 | 66 | 72 (HA1) | E | HA1 |
| 84 | 67 | 73 (HA1) | C | HA1 |
| 85 | 68 | 74 (HA1) | E | HA1 |

|     |     |           |   |     |
|-----|-----|-----------|---|-----|
| 86  | 69  | 75 (HA1)  | S | HA1 |
| 87  | 70  | 76 (HA1)  | L | HA1 |
| 88  | 71  | 77 (HA1)  | S | HA1 |
| 89  | 72  | 78 (HA1)  | T | HA1 |
| 90  | 73  | 79 (HA1)  | A | HA1 |
| 91  | 74  | 80 (HA1)  | S | HA1 |
| 92  | 75  | 81 (HA1)  | S | HA1 |
| 93  | 76  | 82 (HA1)  | W | HA1 |
| 94  | 77  | 83 (HA1)  | S | HA1 |
| 95  | 78  | 84 (HA1)  | Y | HA1 |
| 96  | 79  | 85 (HA1)  | I | HA1 |
| 97  | 80  | 86 (HA1)  | V | HA1 |
| 98  | 81  | 87 (HA1)  | E | HA1 |
| 99  | 82  | 88 (HA1)  | T | HA1 |
| 100 | 83  | 89 (HA1)  | P | HA1 |
| 101 | 84  | 90 (HA1)  | S | HA1 |
| 102 | 85  | 91 (HA1)  | S | HA1 |
| 103 | 86  | 92 (HA1)  | D | HA1 |
| 104 | 87  | 93 (HA1)  | N | HA1 |
| 105 | 88  | 94 (HA1)  | G | HA1 |
| 106 | 89  | 95 (HA1)  | T | HA1 |
| 107 | 90  | 96 (HA1)  | C | HA1 |
| 108 | 91  | 97 (HA1)  | Y | HA1 |
| 109 | 92  | 98 (HA1)  | P | HA1 |
| 110 | 93  | 99 (HA1)  | G | HA1 |
| 111 | 94  | 100 (HA1) | D | HA1 |
| 112 | 95  | 101 (HA1) | F | HA1 |
| 113 | 96  | 102 (HA1) | I | HA1 |
| 114 | 97  | 103 (HA1) | D | HA1 |
| 115 | 98  | 104 (HA1) | Y | HA1 |
| 116 | 99  | 105 (HA1) | E | HA1 |
| 117 | 100 | 106 (HA1) | E | HA1 |
| 118 | 101 | 107 (HA1) | L | HA1 |
| 119 | 102 | 108 (HA1) | R | HA1 |
| 120 | 103 | 109 (HA1) | E | HA1 |
| 121 | 104 | 110 (HA1) | Q | HA1 |
| 122 | 105 | 111 (HA1) | L | HA1 |
| 123 | 106 | 112 (HA1) | S | HA1 |
| 124 | 107 | 113 (HA1) | S | HA1 |
| 125 | 108 | 114 (HA1) | V | HA1 |

|     |     |           |   |     |
|-----|-----|-----------|---|-----|
| 126 | 109 | 115 (HA1) | S | HA1 |
| 127 | 110 | 116 (HA1) | S | HA1 |
| 128 | 111 | 117 (HA1) | F | HA1 |
| 129 | 112 | 118 (HA1) | E | HA1 |
| 130 | 113 | 119 (HA1) | R | HA1 |
| 131 | 114 | 120 (HA1) | F | HA1 |
| 132 | 115 | 121 (HA1) | E | HA1 |
| 133 | 116 | 122 (HA1) | I | HA1 |
| 134 | 117 | 123 (HA1) | F | HA1 |
| 135 | 118 | 124 (HA1) | P | HA1 |
| 136 | 119 | 125 (HA1) | K | HA1 |
| 137 | 120 | 126 (HA1) | T | HA1 |
| 138 | 121 | 127 (HA1) | S | HA1 |
| 139 | 122 | 128 (HA1) | S | HA1 |
| 140 | 123 | 129 (HA1) | W | HA1 |
| 141 | 124 | 130 (HA1) | P | HA1 |
| 142 | 125 | 131 (HA1) | N | HA1 |
| 143 | 126 | 132 (HA1) | H | HA1 |
| 144 | 127 | 133 (HA1) | D | HA1 |
| 145 | 128 | 134 (HA1) | S | HA1 |
| 146 | 129 | 135 (HA1) | N | HA1 |
| 147 | 130 | 136 (HA1) | K | HA1 |
| 148 | 131 | 137 (HA1) | G | HA1 |
| 149 | 132 | 138 (HA1) | V | HA1 |
| 150 | 133 | 139 (HA1) | T | HA1 |
| 151 | 134 | 140 (HA1) | A | HA1 |
| 152 | 135 | 141 (HA1) | A | HA1 |
| 153 | 136 | 142 (HA1) | C | HA1 |
| 154 | 137 | 143 (HA1) | P | HA1 |
| 155 | 138 | 144 (HA1) | H | HA1 |
| 156 | 139 | 145 (HA1) | A | HA1 |
| 157 | 140 | 146 (HA1) | G | HA1 |
| 158 | 141 | 147 (HA1) | A | HA1 |
| 159 | 142 | 148 (HA1) | K | HA1 |
| 160 | 143 | 149 (HA1) | S | HA1 |
| 161 | 144 | 150 (HA1) | F | HA1 |
| 162 | 145 | 151 (HA1) | Y | HA1 |
| 163 | 146 | 152 (HA1) | K | HA1 |
| 164 | 147 | 153 (HA1) | N | HA1 |
| 165 | 148 | 154 (HA1) | L | HA1 |

|     |     |           |   |     |
|-----|-----|-----------|---|-----|
| 166 | 149 | 155 (HA1) | I | HA1 |
| 167 | 150 | 156 (HA1) | W | HA1 |
| 168 | 151 | 157 (HA1) | L | HA1 |
| 169 | 152 | 158 (HA1) | V | HA1 |
| 170 | 153 | 159 (HA1) | K | HA1 |
| 171 | 154 | 160 (HA1) | K | HA1 |
| 172 | 155 | 161 (HA1) | G | HA1 |
| 173 | 156 | 162 (HA1) | N | HA1 |
| 174 | 157 | 163 (HA1) | S | HA1 |
| 175 | 158 | 164 (HA1) | Y | HA1 |
| 176 | 159 | 165 (HA1) | P | HA1 |
| 177 | 160 | 166 (HA1) | K | HA1 |
| 178 | 161 | 167 (HA1) | L | HA1 |
| 179 | 162 | 168 (HA1) | S | HA1 |
| 180 | 163 | 169 (HA1) | K | HA1 |
| 181 | 164 | 170 (HA1) | S | HA1 |
| 182 | 165 | 171 (HA1) | Y | HA1 |
| 183 | 166 | 172 (HA1) | I | HA1 |
| 184 | 167 | 173 (HA1) | N | HA1 |
| 185 | 168 | 174 (HA1) | D | HA1 |
| 186 | 169 | 175 (HA1) | K | HA1 |
| 187 | 170 | 176 (HA1) | G | HA1 |
| 188 | 171 | 177 (HA1) | K | HA1 |
| 189 | 172 | 178 (HA1) | E | HA1 |
| 190 | 173 | 179 (HA1) | V | HA1 |
| 191 | 174 | 180 (HA1) | L | HA1 |
| 192 | 175 | 181 (HA1) | V | HA1 |
| 193 | 176 | 182 (HA1) | L | HA1 |
| 194 | 177 | 183 (HA1) | W | HA1 |
| 195 | 178 | 184 (HA1) | G | HA1 |
| 196 | 179 | 185 (HA1) | I | HA1 |
| 197 | 180 | 186 (HA1) | H | HA1 |
| 198 | 181 | 187 (HA1) | H | HA1 |
| 199 | 182 | 188 (HA1) | P | HA1 |
| 200 | 183 | 189 (HA1) | S | HA1 |
| 201 | 184 | 190 (HA1) | T | HA1 |
| 202 | 185 | 191 (HA1) | S | HA1 |
| 203 | 186 | 192 (HA1) | A | HA1 |
| 204 | 187 | 193 (HA1) | D | HA1 |
| 205 | 188 | 194 (HA1) | Q | HA1 |

|     |     |           |   |     |
|-----|-----|-----------|---|-----|
| 206 | 189 | 195 (HA1) | Q | HA1 |
| 207 | 190 | 196 (HA1) | S | HA1 |
| 208 | 191 | 197 (HA1) | L | HA1 |
| 209 | 192 | 198 (HA1) | Y | HA1 |
| 210 | 193 | 199 (HA1) | Q | HA1 |
| 211 | 194 | 200 (HA1) | N | HA1 |
| 212 | 195 | 201 (HA1) | A | HA1 |
| 213 | 196 | 202 (HA1) | D | HA1 |
| 214 | 197 | 203 (HA1) | T | HA1 |
| 215 | 198 | 204 (HA1) | Y | HA1 |
| 216 | 199 | 205 (HA1) | V | HA1 |
| 217 | 200 | 206 (HA1) | F | HA1 |
| 218 | 201 | 207 (HA1) | V | HA1 |
| 219 | 202 | 208 (HA1) | G | HA1 |
| 220 | 203 | 209 (HA1) | S | HA1 |
| 221 | 204 | 210 (HA1) | S | HA1 |
| 222 | 205 | 211 (HA1) | R | HA1 |
| 223 | 206 | 212 (HA1) | Y | HA1 |
| 224 | 207 | 213 (HA1) | S | HA1 |
| 225 | 208 | 214 (HA1) | K | HA1 |
| 226 | 209 | 215 (HA1) | K | HA1 |
| 227 | 210 | 216 (HA1) | F | HA1 |
| 228 | 211 | 217 (HA1) | K | HA1 |
| 229 | 212 | 218 (HA1) | P | HA1 |
| 230 | 213 | 219 (HA1) | E | HA1 |
| 231 | 214 | 220 (HA1) | I | HA1 |
| 232 | 215 | 221 (HA1) | A | HA1 |
| 233 | 216 | 222 (HA1) | I | HA1 |
| 234 | 217 | 223 (HA1) | R | HA1 |
| 235 | 218 | 224 (HA1) | P | HA1 |
| 236 | 219 | 225 (HA1) | K | HA1 |
| 237 | 220 | 226 (HA1) | V | HA1 |
| 238 | 221 | 227 (HA1) | R | HA1 |
| 239 | 222 | 228 (HA1) | D | HA1 |
| 240 | 223 | 229 (HA1) | Q | HA1 |
| 241 | 224 | 230 (HA1) | E | HA1 |
| 242 | 225 | 231 (HA1) | G | HA1 |
| 243 | 226 | 232 (HA1) | R | HA1 |
| 244 | 227 | 233 (HA1) | M | HA1 |
| 245 | 228 | 234 (HA1) | N | HA1 |



|     |     |           |   |     |
|-----|-----|-----------|---|-----|
| 246 | 229 | 235 (HA1) | Y | HA1 |
| 247 | 230 | 236 (HA1) | Y | HA1 |
| 248 | 231 | 237 (HA1) | W | HA1 |
| 249 | 232 | 238 (HA1) | T | HA1 |
| 250 | 233 | 239 (HA1) | L | HA1 |
| 251 | 234 | 240 (HA1) | V | HA1 |
| 252 | 235 | 241 (HA1) | E | HA1 |
| 253 | 236 | 242 (HA1) | P | HA1 |
| 254 | 237 | 243 (HA1) | G | HA1 |
| 255 | 238 | 244 (HA1) | D | HA1 |
| 256 | 239 | 245 (HA1) | K | HA1 |
| 257 | 240 | 246 (HA1) | I | HA1 |
| 258 | 241 | 247 (HA1) | T | HA1 |
| 259 | 242 | 248 (HA1) | F | HA1 |
| 260 | 243 | 249 (HA1) | E | HA1 |
| 261 | 244 | 250 (HA1) | A | HA1 |
| 262 | 245 | 251 (HA1) | T | HA1 |
| 263 | 246 | 252 (HA1) | G | HA1 |
| 264 | 247 | 253 (HA1) | N | HA1 |
| 265 | 248 | 254 (HA1) | L | HA1 |
| 266 | 249 | 255 (HA1) | V | HA1 |
| 267 | 250 | 256 (HA1) | V | HA1 |
| 268 | 251 | 257 (HA1) | P | HA1 |
| 269 | 252 | 258 (HA1) | R | HA1 |
| 270 | 253 | 259 (HA1) | Y | HA1 |
| 271 | 254 | 260 (HA1) | A | HA1 |
| 272 | 255 | 261 (HA1) | F | HA1 |
| 273 | 256 | 262 (HA1) | A | HA1 |
| 274 | 257 | 263 (HA1) | M | HA1 |
| 275 | 258 | 264 (HA1) | E | HA1 |
| 276 | 259 | 265 (HA1) | R | HA1 |
| 277 | 260 | 266 (HA1) | N | HA1 |
| 278 | 261 | 267 (HA1) | A | HA1 |
| 279 | 262 | 268 (HA1) | G | HA1 |
| 280 | 263 | 269 (HA1) | S | HA1 |
| 281 | 264 | 270 (HA1) | G | HA1 |
| 282 | 265 | 271 (HA1) | I | HA1 |
| 283 | 266 | 272 (HA1) | I | HA1 |
| 284 | 267 | 273 (HA1) | I | HA1 |
| 285 | 268 | 274 (HA1) | S | HA1 |

|     |     |           |   |     |
|-----|-----|-----------|---|-----|
| 286 | 269 | 275 (HA1) | D | HA1 |
| 287 | 270 | 276 (HA1) | T | HA1 |
| 288 | 271 | 277 (HA1) | P | HA1 |
| 289 | 272 | 278 (HA1) | V | HA1 |
| 290 | 273 | 279 (HA1) | H | HA1 |
| 291 | 274 | 280 (HA1) | D | HA1 |
| 292 | 275 | 281 (HA1) | C | HA1 |
| 293 | 276 | 282 (HA1) | N | HA1 |
| 294 | 277 | 283 (HA1) | T | HA1 |
| 295 | 278 | 284 (HA1) | T | HA1 |
| 296 | 279 | 285 (HA1) | C | HA1 |
| 297 | 280 | 286 (HA1) | Q | HA1 |
| 298 | 281 | 287 (HA1) | T | HA1 |
| 299 | 282 | 288 (HA1) | P | HA1 |
| 300 | 283 | 289 (HA1) | K | HA1 |
| 301 | 284 | 290 (HA1) | G | HA1 |
| 302 | 285 | 291 (HA1) | A | HA1 |
| 303 | 286 | 292 (HA1) | I | HA1 |
| 304 | 287 | 293 (HA1) | N | HA1 |
| 305 | 288 | 294 (HA1) | T | HA1 |
| 306 | 289 | 295 (HA1) | S | HA1 |
| 307 | 290 | 296 (HA1) | L | HA1 |
| 308 | 291 | 297 (HA1) | P | HA1 |
| 309 | 292 | 298 (HA1) | F | HA1 |
| 310 | 293 | 299 (HA1) | Q | HA1 |
| 311 | 294 | 300 (HA1) | N | HA1 |
| 312 | 295 | 301 (HA1) | I | HA1 |
| 313 | 296 | 302 (HA1) | H | HA1 |
| 314 | 297 | 303 (HA1) | P | HA1 |
| 315 | 298 | 304 (HA1) | I | HA1 |
| 316 | 299 | 305 (HA1) | T | HA1 |
| 317 | 300 | 306 (HA1) | I | HA1 |
| 318 | 301 | 307 (HA1) | G | HA1 |
| 319 | 302 | 308 (HA1) | K | HA1 |
| 320 | 303 | 309 (HA1) | C | HA1 |
| 321 | 304 | 310 (HA1) | P | HA1 |
| 322 | 305 | 311 (HA1) | K | HA1 |
| 323 | 306 | 312 (HA1) | Y | HA1 |
| 324 | 307 | 313 (HA1) | V | HA1 |
| 325 | 308 | 314 (HA1) | K | HA1 |

|     |     |           |   |     |
|-----|-----|-----------|---|-----|
| 326 | 309 | 315 (HA1) | S | HA1 |
| 327 | 310 | 316 (HA1) | T | HA1 |
| 328 | 311 | 317 (HA1) | K | HA1 |
| 329 | 312 | 318 (HA1) | L | HA1 |
| 330 | 313 | 319 (HA1) | R | HA1 |
| 331 | 314 | 320 (HA1) | L | HA1 |
| 332 | 315 | 321 (HA1) | A | HA1 |
| 333 | 316 | 322 (HA1) | T | HA1 |
| 334 | 317 | 323 (HA1) | G | HA1 |
| 335 | 318 | 324 (HA1) | L | HA1 |
| 336 | 319 | 325 (HA1) | R | HA1 |
| 337 | 320 | 326 (HA1) | N | HA1 |
| 338 | 321 | 327 (HA1) | I | HA1 |
| 339 | 322 | -         | P |     |
| 340 | 323 | -         | S |     |
| 341 | 324 | -         | I |     |
| 342 | 325 | -         | Q |     |
| 343 | 326 | -         | S |     |
| 344 | 327 | -         | R |     |
| 345 | 328 | 1 (HA2)   | G | HA2 |
| 346 | 329 | 2 (HA2)   | L | HA2 |
| 347 | 330 | 3 (HA2)   | F | HA2 |
| 348 | 331 | 4 (HA2)   | G | HA2 |
| 349 | 332 | 5 (HA2)   | A | HA2 |
| 350 | 333 | 6 (HA2)   | I | HA2 |
| 351 | 334 | 7 (HA2)   | A | HA2 |
| 352 | 335 | 8 (HA2)   | G | HA2 |
| 353 | 336 | 9 (HA2)   | F | HA2 |
| 354 | 337 | 10 (HA2)  | I | HA2 |
| 355 | 338 | 11 (HA2)  | E | HA2 |
| 356 | 339 | 12 (HA2)  | G | HA2 |
| 357 | 340 | 13 (HA2)  | G | HA2 |
| 358 | 341 | 14 (HA2)  | W | HA2 |
| 359 | 342 | 15 (HA2)  | T | HA2 |
| 360 | 343 | 16 (HA2)  | G | HA2 |
| 361 | 344 | 17 (HA2)  | M | HA2 |
| 362 | 345 | 18 (HA2)  | V | HA2 |
| 363 | 346 | 19 (HA2)  | D | HA2 |
| 364 | 347 | 20 (HA2)  | G | HA2 |
| 365 | 348 | 21 (HA2)  | W | HA2 |

|     |     |          |   |     |
|-----|-----|----------|---|-----|
| 366 | 349 | 22 (HA2) | Y | HA2 |
| 367 | 350 | 23 (HA2) | G | HA2 |
| 368 | 351 | 24 (HA2) | Y | HA2 |
| 369 | 352 | 25 (HA2) | H | HA2 |
| 370 | 353 | 26 (HA2) | H | HA2 |
| 371 | 354 | 27 (HA2) | Q | HA2 |
| 372 | 355 | 28 (HA2) | N | HA2 |
| 373 | 356 | 29 (HA2) | E | HA2 |
| 374 | 357 | 30 (HA2) | Q | HA2 |
| 375 | 358 | 31 (HA2) | G | HA2 |
| 376 | 359 | 32 (HA2) | S | HA2 |
| 377 | 360 | 33 (HA2) | G | HA2 |
| 378 | 361 | 34 (HA2) | Y | HA2 |
| 379 | 362 | 35 (HA2) | A | HA2 |
| 380 | 363 | 36 (HA2) | A | HA2 |
| 381 | 364 | 37 (HA2) | D | HA2 |
| 382 | 365 | 38 (HA2) | L | HA2 |
| 383 | 366 | 39 (HA2) | K | HA2 |
| 384 | 367 | 40 (HA2) | S | HA2 |
| 385 | 368 | 41 (HA2) | T | HA2 |
| 386 | 369 | 42 (HA2) | Q | HA2 |
| 387 | 370 | 43 (HA2) | N | HA2 |
| 388 | 371 | 44 (HA2) | A | HA2 |
| 389 | 372 | 45 (HA2) | I | HA2 |
| 390 | 373 | 46 (HA2) | D | HA2 |
| 391 | 374 | 47 (HA2) | E | HA2 |
| 392 | 375 | 48 (HA2) | I | HA2 |
| 393 | 376 | 49 (HA2) | T | HA2 |
| 394 | 377 | 50 (HA2) | N | HA2 |
| 395 | 378 | 51 (HA2) | K | HA2 |
| 396 | 379 | 52 (HA2) | V | HA2 |
| 397 | 380 | 53 (HA2) | N | HA2 |
| 398 | 381 | 54 (HA2) | S | HA2 |
| 399 | 382 | 55 (HA2) | V | HA2 |
| 400 | 383 | 56 (HA2) | I | HA2 |
| 401 | 384 | 57 (HA2) | E | HA2 |
| 402 | 385 | 58 (HA2) | K | HA2 |
| 403 | 386 | 59 (HA2) | M | HA2 |
| 404 | 387 | 60 (HA2) | N | HA2 |
| 405 | 388 | 61 (HA2) | T | HA2 |

|     |     |           |   |     |
|-----|-----|-----------|---|-----|
| 406 | 389 | 62 (HA2)  | Q | HA2 |
| 407 | 390 | 63 (HA2)  | F | HA2 |
| 408 | 391 | 64 (HA2)  | T | HA2 |
| 409 | 392 | 65 (HA2)  | A | HA2 |
| 410 | 393 | 66 (HA2)  | V | HA2 |
| 411 | 394 | 67 (HA2)  | G | HA2 |
| 412 | 395 | 68 (HA2)  | K | HA2 |
| 413 | 396 | 69 (HA2)  | E | HA2 |
| 414 | 397 | 70 (HA2)  | F | HA2 |
| 415 | 398 | 71 (HA2)  | N | HA2 |
| 416 | 399 | 72 (HA2)  | H | HA2 |
| 417 | 400 | 73 (HA2)  | L | HA2 |
| 418 | 401 | 74 (HA2)  | E | HA2 |
| 419 | 402 | 75 (HA2)  | K | HA2 |
| 420 | 403 | 76 (HA2)  | R | HA2 |
| 421 | 404 | 77 (HA2)  | I | HA2 |
| 422 | 405 | 78 (HA2)  | E | HA2 |
| 423 | 406 | 79 (HA2)  | N | HA2 |
| 424 | 407 | 80 (HA2)  | L | HA2 |
| 425 | 408 | 81 (HA2)  | N | HA2 |
| 426 | 409 | 82 (HA2)  | K | HA2 |
| 427 | 410 | 83 (HA2)  | K | HA2 |
| 428 | 411 | 84 (HA2)  | V | HA2 |
| 429 | 412 | 85 (HA2)  | D | HA2 |
| 430 | 413 | 86 (HA2)  | D | HA2 |
| 431 | 414 | 87 (HA2)  | G | HA2 |
| 432 | 415 | 88 (HA2)  | F | HA2 |
| 433 | 416 | 89 (HA2)  | L | HA2 |
| 434 | 417 | 90 (HA2)  | D | HA2 |
| 435 | 418 | 91 (HA2)  | I | HA2 |
| 436 | 419 | 92 (HA2)  | W | HA2 |
| 437 | 420 | 93 (HA2)  | T | HA2 |
| 438 | 421 | 94 (HA2)  | Y | HA2 |
| 439 | 422 | 95 (HA2)  | N | HA2 |
| 440 | 423 | 96 (HA2)  | A | HA2 |
| 441 | 424 | 97 (HA2)  | E | HA2 |
| 442 | 425 | 98 (HA2)  | L | HA2 |
| 443 | 426 | 99 (HA2)  | L | HA2 |
| 444 | 427 | 100 (HA2) | V | HA2 |
| 445 | 428 | 101 (HA2) | L | HA2 |



|     |     |           |   |     |
|-----|-----|-----------|---|-----|
| 446 | 429 | 102 (HA2) | L | HA2 |
| 447 | 430 | 103 (HA2) | E | HA2 |
| 448 | 431 | 104 (HA2) | N | HA2 |
| 449 | 432 | 105 (HA2) | E | HA2 |
| 450 | 433 | 106 (HA2) | R | HA2 |
| 451 | 434 | 107 (HA2) | T | HA2 |
| 452 | 435 | 108 (HA2) | L | HA2 |
| 453 | 436 | 109 (HA2) | D | HA2 |
| 454 | 437 | 110 (HA2) | Y | HA2 |
| 455 | 438 | 111 (HA2) | H | HA2 |
| 456 | 439 | 112 (HA2) | D | HA2 |
| 457 | 440 | 113 (HA2) | S | HA2 |
| 458 | 441 | 114 (HA2) | N | HA2 |
| 459 | 442 | 115 (HA2) | V | HA2 |
| 460 | 443 | 116 (HA2) | K | HA2 |
| 461 | 444 | 117 (HA2) | N | HA2 |
| 462 | 445 | 118 (HA2) | L | HA2 |
| 463 | 446 | 119 (HA2) | Y | HA2 |
| 464 | 447 | 120 (HA2) | E | HA2 |
| 465 | 448 | 121 (HA2) | K | HA2 |
| 466 | 449 | 122 (HA2) | V | HA2 |
| 467 | 450 | 123 (HA2) | R | HA2 |
| 468 | 451 | 124 (HA2) | S | HA2 |
| 469 | 452 | 125 (HA2) | Q | HA2 |
| 470 | 453 | 126 (HA2) | L | HA2 |
| 471 | 454 | 127 (HA2) | K | HA2 |
| 472 | 455 | 128 (HA2) | N | HA2 |
| 473 | 456 | 129 (HA2) | N | HA2 |
| 474 | 457 | 130 (HA2) | A | HA2 |
| 475 | 458 | 131 (HA2) | K | HA2 |
| 476 | 459 | 132 (HA2) | E | HA2 |
| 477 | 460 | 133 (HA2) | I | HA2 |
| 478 | 461 | 134 (HA2) | G | HA2 |
| 479 | 462 | 135 (HA2) | N | HA2 |
| 480 | 463 | 136 (HA2) | G | HA2 |
| 481 | 464 | 137 (HA2) | C | HA2 |
| 482 | 465 | 138 (HA2) | F | HA2 |
| 483 | 466 | 139 (HA2) | E | HA2 |
| 484 | 467 | 140 (HA2) | F | HA2 |
| 485 | 468 | 141 (HA2) | Y | HA2 |

|     |     |           |   |                 |
|-----|-----|-----------|---|-----------------|
| 486 | 469 | 142 (HA2) | H | HA2             |
| 487 | 470 | 143 (HA2) | K | HA2             |
| 488 | 471 | 144 (HA2) | C | HA2             |
| 489 | 472 | 145 (HA2) | D | HA2             |
| 490 | 473 | 146 (HA2) | N | HA2             |
| 491 | 474 | 147 (HA2) | T | HA2             |
| 492 | 475 | 148 (HA2) | C | HA2             |
| 493 | 476 | 149 (HA2) | M | HA2             |
| 494 | 477 | 150 (HA2) | E | HA2             |
| 495 | 478 | 151 (HA2) | S | HA2             |
| 496 | 479 | 152 (HA2) | V | HA2             |
| 497 | 480 | 153 (HA2) | K | HA2             |
| 498 | 481 | 154 (HA2) | N | HA2             |
| 499 | 482 | 155 (HA2) | G | HA2             |
| 500 | 483 | 156 (HA2) | T | HA2             |
| 501 | 484 | 157 (HA2) | Y | HA2             |
| 502 | 485 | 158 (HA2) | D | HA2             |
| 503 | 486 | 159 (HA2) | Y | HA2             |
| 504 | 487 | 160 (HA2) | P | HA2             |
| 505 | 488 | 161 (HA2) | K | HA2             |
| 506 | 489 | 162 (HA2) | Y | HA2             |
| 507 | 490 | -         | S |                 |
| 508 | 491 | -         | E |                 |
| 509 | 492 | -         | E |                 |
| 510 | 493 | -         | A |                 |
| 511 | 494 | -         | K |                 |
| 512 | 495 | -         | L |                 |
| 513 | 496 | -         | N |                 |
| 514 | 497 | -         | R |                 |
| 515 | 498 | -         | E |                 |
| 516 | 499 | -         | E |                 |
| 517 | 500 | -         | I |                 |
| 518 | 501 | -         | D |                 |
| 519 | 502 | -         | G |                 |
| 520 | 503 | -         | V | Flexible Linker |
| 521 | 504 | -         | K | Flexible Linker |
| 522 | 505 | -         | L | Flexible Linker |
| 523 | 506 | -         | E | Flexible Linker |
| 524 | 507 | -         | S | Flexible Linker |
| 525 | 508 | -         | T | Flexible Linker |

|     |     |   |   |                 |
|-----|-----|---|---|-----------------|
| 526 | 509 | - | R | Flexible Linker |
| 527 | 510 | - | I | Flexible Linker |
| 528 | 511 | - | Y |                 |
| 529 | 512 | - | Q | Transmembrane   |
| 530 | 513 | - | I | Transmembrane   |
| 531 | 514 | - | L | Transmembrane   |
| 532 | 515 | - | A | Transmembrane   |
| 533 | 516 | - | I | Transmembrane   |
| 534 | 517 | - | Y | Transmembrane   |
| 535 | 518 | - | S | Transmembrane   |
| 536 | 519 | - | T | Transmembrane   |
| 537 | 520 | - | V | Transmembrane   |
| 538 | 521 | - | A | Transmembrane   |
| 539 | 522 | - | S | Transmembrane   |
| 540 | 523 | - | S | Transmembrane   |
| 541 | 524 | - | L | Transmembrane   |
| 542 | 525 | - | V | Transmembrane   |
| 543 | 526 | - | L | Transmembrane   |
| 544 | 527 | - | V | Transmembrane   |
| 545 | 528 | - | V | Transmembrane   |
| 546 | 529 | - | S | Transmembrane   |
| 547 | 530 | - | L | Transmembrane   |
| 548 | 531 | - | G | Transmembrane   |
| 549 | 532 | - | A | Transmembrane   |
| 550 | 533 | - | I | Transmembrane   |
| 551 | 534 | - | S | Transmembrane   |
| 552 | 535 | - | F | Transmembrane   |
| 553 | 536 | - | W | Transmembrane   |
| 554 | 537 | - | M | Transmembrane   |
| 555 | 538 | - | C |                 |
| 556 | 539 | - | S |                 |
| 557 | 540 | - | N |                 |
| 558 | 541 | - | G |                 |
| 559 | 542 | - | S |                 |
| 560 | 543 | - | L |                 |
| 561 | 544 | - | Q |                 |
| 562 | 545 | - | C |                 |
| 563 | 546 | - | R |                 |
| 564 | 547 | - | I |                 |
| 565 | 548 | - | C |                 |

**Table S4.** Comparison of multiple HA numbering schemes using a H3 (A/Aichi/2/1968(H3N2)) template. Template for FLU DB numbering is H3. Flexible linker and transmembrane domain were located by aligning to A/duck/Alberta/35/76(H1N1), PDB ID: 6HJR.

| position on CDS | FLU DB H3 numbering | structure-based H3 numbering (4HMG) | Residue | Annotation     |
|-----------------|---------------------|-------------------------------------|---------|----------------|
| 1               | -                   | -                                   | M       | Signal peptide |
| 2               | -                   | -                                   | K       | Signal peptide |
| 3               | -                   | -                                   | T       | Signal peptide |
| 4               | -                   | -                                   | I       | Signal peptide |
| 5               | -                   | -                                   | I       | Signal peptide |
| 6               | -                   | -                                   | A       | Signal peptide |
| 7               | -                   | -                                   | L       | Signal peptide |
| 8               | -                   | -                                   | S       | Signal peptide |
| 9               | -                   | -                                   | Y       | Signal peptide |
| 10              | -                   | -                                   | I       | Signal peptide |
| 11              | -                   | -                                   | L       | Signal peptide |
| 12              | -                   | -                                   | C       | Signal peptide |
| 13              | -                   | -                                   | L       | Signal peptide |
| 14              | -                   | -                                   | V       | Signal peptide |
| 15              | -                   | -                                   | F       | Signal peptide |
| 16              | -                   | -                                   | A       | Signal peptide |
| 17              |                     | 1 1 (HA1)                           | Q       | HA1            |
| 18              |                     | 2 2 (HA1)                           | D       | HA1            |
| 19              |                     | 3 3 (HA1)                           | L       | HA1            |
| 20              |                     | 4 4 (HA1)                           | P       | HA1            |
| 21              |                     | 5 5 (HA1)                           | G       | HA1            |
| 22              |                     | 6 6 (HA1)                           | N       | HA1            |
| 23              |                     | 7 7 (HA1)                           | D       | HA1            |
| 24              |                     | 8 8 (HA1)                           | N       | HA1            |
| 25              |                     | 9 9 (HA1)                           | S       | HA1            |
| 26              |                     | 10 10 (HA1)                         | T       | HA1            |
| 27              |                     | 11 11 (HA1)                         | A       | HA1            |
| 28              |                     | 12 12 (HA1)                         | T       | HA1            |
| 29              |                     | 13 13 (HA1)                         | L       | HA1            |
| 30              |                     | 14 14 (HA1)                         | C       | HA1            |
| 31              |                     | 15 15 (HA1)                         | L       | HA1            |
| 32              |                     | 16 16 (HA1)                         | G       | HA1            |
| 33              |                     | 17 17 (HA1)                         | H       | HA1            |
| 34              |                     | 18 18 (HA1)                         | H       | HA1            |
| 35              |                     | 19 19 (HA1)                         | A       | HA1            |
| 36              |                     | 20 20 (HA1)                         | V       | HA1            |
| 37              |                     | 21 21 (HA1)                         | P       | HA1            |
| 38              |                     | 22 22 (HA1)                         | N       | HA1            |
| 39              |                     | 23 23 (HA1)                         | G       | HA1            |
| 40              |                     | 24 24 (HA1)                         | T       | HA1            |
| 41              |                     | 25 25 (HA1)                         | L       | HA1            |
| 42              |                     | 26 26 (HA1)                         | V       | HA1            |
| 43              |                     | 27 27 (HA1)                         | K       | HA1            |
| 44              |                     | 28 28 (HA1)                         | T       | HA1            |
| 45              |                     | 29 29 (HA1)                         | I       | HA1            |
| 46              |                     | 30 30 (HA1)                         | T       | HA1            |

|     |    |          |   |     |
|-----|----|----------|---|-----|
| 47  | 31 | 31 (HA1) | D | HA1 |
| 48  | 32 | 32 (HA1) | D | HA1 |
| 49  | 33 | 33 (HA1) | Q | HA1 |
| 50  | 34 | 34 (HA1) | I | HA1 |
| 51  | 35 | 35 (HA1) | E | HA1 |
| 52  | 36 | 36 (HA1) | V | HA1 |
| 53  | 37 | 37 (HA1) | T | HA1 |
| 54  | 38 | 38 (HA1) | N | HA1 |
| 55  | 39 | 39 (HA1) | A | HA1 |
| 56  | 40 | 40 (HA1) | T | HA1 |
| 57  | 41 | 41 (HA1) | E | HA1 |
| 58  | 42 | 42 (HA1) | L | HA1 |
| 59  | 43 | 43 (HA1) | V | HA1 |
| 60  | 44 | 44 (HA1) | Q | HA1 |
| 61  | 45 | 45 (HA1) | S | HA1 |
| 62  | 46 | 46 (HA1) | S | HA1 |
| 63  | 47 | 47 (HA1) | S | HA1 |
| 64  | 48 | 48 (HA1) | T | HA1 |
| 65  | 49 | 49 (HA1) | G | HA1 |
| 66  | 50 | 50 (HA1) | K | HA1 |
| 67  | 51 | 51 (HA1) | I | HA1 |
| 68  | 52 | 52 (HA1) | C | HA1 |
| 69  | 53 | 53 (HA1) | N | HA1 |
| 70  | 54 | 54 (HA1) | N | HA1 |
| 71  | 55 | 55 (HA1) | P | HA1 |
| 72  | 56 | 56 (HA1) | H | HA1 |
| 73  | 57 | 57 (HA1) | R | HA1 |
| 74  | 58 | 58 (HA1) | I | HA1 |
| 75  | 59 | 59 (HA1) | L | HA1 |
| 76  | 60 | 60 (HA1) | D | HA1 |
| 77  | 61 | 61 (HA1) | G | HA1 |
| 78  | 62 | 62 (HA1) | I | HA1 |
| 79  | 63 | 63 (HA1) | D | HA1 |
| 80  | 64 | 64 (HA1) | C | HA1 |
| 81  | 65 | 65 (HA1) | T | HA1 |
| 82  | 66 | 66 (HA1) | L | HA1 |
| 83  | 67 | 67 (HA1) | I | HA1 |
| 84  | 68 | 68 (HA1) | D | HA1 |
| 85  | 69 | 69 (HA1) | A | HA1 |
| 86  | 70 | 70 (HA1) | L | HA1 |
| 87  | 71 | 71 (HA1) | L | HA1 |
| 88  | 72 | 72 (HA1) | G | HA1 |
| 89  | 73 | 73 (HA1) | D | HA1 |
| 90  | 74 | 74 (HA1) | P | HA1 |
| 91  | 75 | 75 (HA1) | H | HA1 |
| 92  | 76 | 76 (HA1) | C | HA1 |
| 93  | 77 | 77 (HA1) | D | HA1 |
| 94  | 78 | 78 (HA1) | V | HA1 |
| 95  | 79 | 79 (HA1) | F | HA1 |
| 96  | 80 | 80 (HA1) | Q | HA1 |
| 97  | 81 | 81 (HA1) | N | HA1 |
| 98  | 82 | 82 (HA1) | E | HA1 |
| 99  | 83 | 83 (HA1) | T | HA1 |
| 100 | 84 | 84 (HA1) | W | HA1 |



|     |     |           |   |     |
|-----|-----|-----------|---|-----|
| 101 | 85  | 85 (HA1)  | D | HA1 |
| 102 | 86  | 86 (HA1)  | L | HA1 |
| 103 | 87  | 87 (HA1)  | F | HA1 |
| 104 | 88  | 88 (HA1)  | V | HA1 |
| 105 | 89  | 89 (HA1)  | E | HA1 |
| 106 | 90  | 90 (HA1)  | R | HA1 |
| 107 | 91  | 91 (HA1)  | S | HA1 |
| 108 | 92  | 92 (HA1)  | K | HA1 |
| 109 | 93  | 93 (HA1)  | A | HA1 |
| 110 | 94  | 94 (HA1)  | F | HA1 |
| 111 | 95  | 95 (HA1)  | S | HA1 |
| 112 | 96  | 96 (HA1)  | N | HA1 |
| 113 | 97  | 97 (HA1)  | C | HA1 |
| 114 | 98  | 98 (HA1)  | Y | HA1 |
| 115 | 99  | 99 (HA1)  | P | HA1 |
| 116 | 100 | 100 (HA1) | Y | HA1 |
| 117 | 101 | 101 (HA1) | D | HA1 |
| 118 | 102 | 102 (HA1) | V | HA1 |
| 119 | 103 | 103 (HA1) | P | HA1 |
| 120 | 104 | 104 (HA1) | D | HA1 |
| 121 | 105 | 105 (HA1) | Y | HA1 |
| 122 | 106 | 106 (HA1) | A | HA1 |
| 123 | 107 | 107 (HA1) | S | HA1 |
| 124 | 108 | 108 (HA1) | L | HA1 |
| 125 | 109 | 109 (HA1) | R | HA1 |
| 126 | 110 | 110 (HA1) | S | HA1 |
| 127 | 111 | 111 (HA1) | L | HA1 |
| 128 | 112 | 112 (HA1) | V | HA1 |
| 129 | 113 | 113 (HA1) | A | HA1 |
| 130 | 114 | 114 (HA1) | S | HA1 |
| 131 | 115 | 115 (HA1) | S | HA1 |
| 132 | 116 | 116 (HA1) | G | HA1 |
| 133 | 117 | 117 (HA1) | T | HA1 |
| 134 | 118 | 118 (HA1) | L | HA1 |
| 135 | 119 | 119 (HA1) | E | HA1 |
| 136 | 120 | 120 (HA1) | F | HA1 |
| 137 | 121 | 121 (HA1) | I | HA1 |
| 138 | 122 | 122 (HA1) | T | HA1 |
| 139 | 123 | 123 (HA1) | E | HA1 |
| 140 | 124 | 124 (HA1) | G | HA1 |
| 141 | 125 | 125 (HA1) | F | HA1 |
| 142 | 126 | 126 (HA1) | T | HA1 |
| 143 | 127 | 127 (HA1) | W | HA1 |
| 144 | 128 | 128 (HA1) | T | HA1 |
| 145 | 129 | 129 (HA1) | G | HA1 |
| 146 | 130 | 130 (HA1) | V | HA1 |
| 147 | 131 | 131 (HA1) | T | HA1 |
| 148 | 132 | 132 (HA1) | Q | HA1 |
| 149 | 133 | 133 (HA1) | N | HA1 |
| 150 | 134 | 134 (HA1) | G | HA1 |
| 151 | 135 | 135 (HA1) | G | HA1 |
| 152 | 136 | 136 (HA1) | S | HA1 |
| 153 | 137 | 137 (HA1) | N | HA1 |
| 154 | 138 | 138 (HA1) | A | HA1 |

|     |     |           |   |     |
|-----|-----|-----------|---|-----|
| 155 | 139 | 139 (HA1) | C | HA1 |
| 156 | 140 | 140 (HA1) | K | HA1 |
| 157 | 141 | 141 (HA1) | R | HA1 |
| 158 | 142 | 142 (HA1) | G | HA1 |
| 159 | 143 | 143 (HA1) | P | HA1 |
| 160 | 144 | 144 (HA1) | G | HA1 |
| 161 | 145 | 145 (HA1) | S | HA1 |
| 162 | 146 | 146 (HA1) | G | HA1 |
| 163 | 147 | 147 (HA1) | F | HA1 |
| 164 | 148 | 148 (HA1) | F | HA1 |
| 165 | 149 | 149 (HA1) | S | HA1 |
| 166 | 150 | 150 (HA1) | R | HA1 |
| 167 | 151 | 151 (HA1) | L | HA1 |
| 168 | 152 | 152 (HA1) | N | HA1 |
| 169 | 153 | 153 (HA1) | W | HA1 |
| 170 | 154 | 154 (HA1) | L | HA1 |
| 171 | 155 | 155 (HA1) | T | HA1 |
| 172 | 156 | 156 (HA1) | K | HA1 |
| 173 | 157 | 157 (HA1) | S | HA1 |
| 174 | 158 | 158 (HA1) | G | HA1 |
| 175 | 159 | 159 (HA1) | S | HA1 |
| 176 | 160 | 160 (HA1) | T | HA1 |
| 177 | 161 | 161 (HA1) | Y | HA1 |
| 178 | 162 | 162 (HA1) | P | HA1 |
| 179 | 163 | 163 (HA1) | V | HA1 |
| 180 | 164 | 164 (HA1) | L | HA1 |
| 181 | 165 | 165 (HA1) | N | HA1 |
| 182 | 166 | 166 (HA1) | V | HA1 |
| 183 | 167 | 167 (HA1) | T | HA1 |
| 184 | 168 | 168 (HA1) | M | HA1 |
| 185 | 169 | 169 (HA1) | P | HA1 |
| 186 | 170 | 170 (HA1) | N | HA1 |
| 187 | 171 | 171 (HA1) | N | HA1 |
| 188 | 172 | 172 (HA1) | D | HA1 |
| 189 | 173 | 173 (HA1) | N | HA1 |
| 190 | 174 | 174 (HA1) | F | HA1 |
| 191 | 175 | 175 (HA1) | D | HA1 |
| 192 | 176 | 176 (HA1) | K | HA1 |
| 193 | 177 | 177 (HA1) | L | HA1 |
| 194 | 178 | 178 (HA1) | Y | HA1 |
| 195 | 179 | 179 (HA1) | I | HA1 |
| 196 | 180 | 180 (HA1) | W | HA1 |
| 197 | 181 | 181 (HA1) | G | HA1 |
| 198 | 182 | 182 (HA1) | I | HA1 |
| 199 | 183 | 183 (HA1) | H | HA1 |
| 200 | 184 | 184 (HA1) | H | HA1 |
| 201 | 185 | 185 (HA1) | P | HA1 |
| 202 | 186 | 186 (HA1) | S | HA1 |
| 203 | 187 | 187 (HA1) | T | HA1 |
| 204 | 188 | 188 (HA1) | N | HA1 |
| 205 | 189 | 189 (HA1) | Q | HA1 |
| 206 | 190 | 190 (HA1) | E | HA1 |
| 207 | 191 | 191 (HA1) | Q | HA1 |
| 208 | 192 | 192 (HA1) | T | HA1 |

|     |     |           |   |     |
|-----|-----|-----------|---|-----|
| 209 | 193 | 193 (HA1) | S | HA1 |
| 210 | 194 | 194 (HA1) | L | HA1 |
| 211 | 195 | 195 (HA1) | Y | HA1 |
| 212 | 196 | 196 (HA1) | V | HA1 |
| 213 | 197 | 197 (HA1) | Q | HA1 |
| 214 | 198 | 198 (HA1) | A | HA1 |
| 215 | 199 | 199 (HA1) | S | HA1 |
| 216 | 200 | 200 (HA1) | G | HA1 |
| 217 | 201 | 201 (HA1) | R | HA1 |
| 218 | 202 | 202 (HA1) | V | HA1 |
| 219 | 203 | 203 (HA1) | T | HA1 |
| 220 | 204 | 204 (HA1) | V | HA1 |
| 221 | 205 | 205 (HA1) | S | HA1 |
| 222 | 206 | 206 (HA1) | T | HA1 |
| 223 | 207 | 207 (HA1) | R | HA1 |
| 224 | 208 | 208 (HA1) | R | HA1 |
| 225 | 209 | 209 (HA1) | S | HA1 |
| 226 | 210 | 210 (HA1) | Q | HA1 |
| 227 | 211 | 211 (HA1) | Q | HA1 |
| 228 | 212 | 212 (HA1) | T | HA1 |
| 229 | 213 | 213 (HA1) | I | HA1 |
| 230 | 214 | 214 (HA1) | I | HA1 |
| 231 | 215 | 215 (HA1) | P | HA1 |
| 232 | 216 | 216 (HA1) | N | HA1 |
| 233 | 217 | 217 (HA1) | I | HA1 |
| 234 | 218 | 218 (HA1) | G | HA1 |
| 235 | 219 | 219 (HA1) | S | HA1 |
| 236 | 220 | 220 (HA1) | R | HA1 |
| 237 | 221 | 221 (HA1) | P | HA1 |
| 238 | 222 | 222 (HA1) | W | HA1 |
| 239 | 223 | 223 (HA1) | V | HA1 |
| 240 | 224 | 224 (HA1) | R | HA1 |
| 241 | 225 | 225 (HA1) | G | HA1 |
| 242 | 226 | 226 (HA1) | L | HA1 |
| 243 | 227 | 227 (HA1) | S | HA1 |
| 244 | 228 | 228 (HA1) | S | HA1 |
| 245 | 229 | 229 (HA1) | R | HA1 |
| 246 | 230 | 230 (HA1) | I | HA1 |
| 247 | 231 | 231 (HA1) | S | HA1 |
| 248 | 232 | 232 (HA1) | I | HA1 |
| 249 | 233 | 233 (HA1) | Y | HA1 |
| 250 | 234 | 234 (HA1) | W | HA1 |
| 251 | 235 | 235 (HA1) | T | HA1 |
| 252 | 236 | 236 (HA1) | I | HA1 |
| 253 | 237 | 237 (HA1) | V | HA1 |
| 254 | 238 | 238 (HA1) | K | HA1 |
| 255 | 239 | 239 (HA1) | P | HA1 |
| 256 | 240 | 240 (HA1) | G | HA1 |
| 257 | 241 | 241 (HA1) | D | HA1 |
| 258 | 242 | 242 (HA1) | V | HA1 |
| 259 | 243 | 243 (HA1) | L | HA1 |
| 260 | 244 | 244 (HA1) | V | HA1 |
| 261 | 245 | 245 (HA1) | I | HA1 |
| 262 | 246 | 246 (HA1) | N | HA1 |

|     |     |           |   |     |
|-----|-----|-----------|---|-----|
| 263 | 247 | 247 (HA1) | S | HA1 |
| 264 | 248 | 248 (HA1) | N | HA1 |
| 265 | 249 | 249 (HA1) | G | HA1 |
| 266 | 250 | 250 (HA1) | N | HA1 |
| 267 | 251 | 251 (HA1) | L | HA1 |
| 268 | 252 | 252 (HA1) | I | HA1 |
| 269 | 253 | 253 (HA1) | A | HA1 |
| 270 | 254 | 254 (HA1) | P | HA1 |
| 271 | 255 | 255 (HA1) | R | HA1 |
| 272 | 256 | 256 (HA1) | G | HA1 |
| 273 | 257 | 257 (HA1) | Y | HA1 |
| 274 | 258 | 258 (HA1) | F | HA1 |
| 275 | 259 | 259 (HA1) | K | HA1 |
| 276 | 260 | 260 (HA1) | M | HA1 |
| 277 | 261 | 261 (HA1) | R | HA1 |
| 278 | 262 | 262 (HA1) | T | HA1 |
| 279 | 263 | 263 (HA1) | G | HA1 |
| 280 | 264 | 264 (HA1) | K | HA1 |
| 281 | 265 | 265 (HA1) | S | HA1 |
| 282 | 266 | 266 (HA1) | S | HA1 |
| 283 | 267 | 267 (HA1) | I | HA1 |
| 284 | 268 | 268 (HA1) | M | HA1 |
| 285 | 269 | 269 (HA1) | R | HA1 |
| 286 | 270 | 270 (HA1) | S | HA1 |
| 287 | 271 | 271 (HA1) | D | HA1 |
| 288 | 272 | 272 (HA1) | A | HA1 |
| 289 | 273 | 273 (HA1) | P | HA1 |
| 290 | 274 | 274 (HA1) | I | HA1 |
| 291 | 275 | 275 (HA1) | D | HA1 |
| 292 | 276 | 276 (HA1) | T | HA1 |
| 293 | 277 | 277 (HA1) | C | HA1 |
| 294 | 278 | 278 (HA1) | I | HA1 |
| 295 | 279 | 279 (HA1) | S | HA1 |
| 296 | 280 | 280 (HA1) | E | HA1 |
| 297 | 281 | 281 (HA1) | C | HA1 |
| 298 | 282 | 282 (HA1) | I | HA1 |
| 299 | 283 | 283 (HA1) | T | HA1 |
| 300 | 284 | 284 (HA1) | P | HA1 |
| 301 | 285 | 285 (HA1) | N | HA1 |
| 302 | 286 | 286 (HA1) | G | HA1 |
| 303 | 287 | 287 (HA1) | S | HA1 |
| 304 | 288 | 288 (HA1) | I | HA1 |
| 305 | 289 | 289 (HA1) | P | HA1 |
| 306 | 290 | 290 (HA1) | N | HA1 |
| 307 | 291 | 291 (HA1) | D | HA1 |
| 308 | 292 | 292 (HA1) | K | HA1 |
| 309 | 293 | 293 (HA1) | P | HA1 |
| 310 | 294 | 294 (HA1) | F | HA1 |
| 311 | 295 | 295 (HA1) | Q | HA1 |
| 312 | 296 | 296 (HA1) | N | HA1 |
| 313 | 297 | 297 (HA1) | V | HA1 |
| 314 | 298 | 298 (HA1) | N | HA1 |
| 315 | 299 | 299 (HA1) | K | HA1 |
| 316 | 300 | 300 (HA1) | I | HA1 |

|     |     |           |   |     |
|-----|-----|-----------|---|-----|
| 317 | 301 | 301 (HA1) | T | HA1 |
| 318 | 302 | 302 (HA1) | Y | HA1 |
| 319 | 303 | 303 (HA1) | G | HA1 |
| 320 | 304 | 304 (HA1) | A | HA1 |
| 321 | 305 | 305 (HA1) | C | HA1 |
| 322 | 306 | 306 (HA1) | P | HA1 |
| 323 | 307 | 307 (HA1) | K | HA1 |
| 324 | 308 | 308 (HA1) | Y | HA1 |
| 325 | 309 | 309 (HA1) | V | HA1 |
| 326 | 310 | 310 (HA1) | K | HA1 |
| 327 | 311 | 311 (HA1) | Q | HA1 |
| 328 | 312 | 312 (HA1) | N | HA1 |
| 329 | 313 | 313 (HA1) | T | HA1 |
| 330 | 314 | 314 (HA1) | L | HA1 |
| 331 | 315 | 315 (HA1) | K | HA1 |
| 332 | 316 | 316 (HA1) | L | HA1 |
| 333 | 317 | 317 (HA1) | A | HA1 |
| 334 | 318 | 318 (HA1) | T | HA1 |
| 335 | 319 | 319 (HA1) | G | HA1 |
| 336 | 320 | 320 (HA1) | M | HA1 |
| 337 | 321 | 321 (HA1) | R | HA1 |
| 338 | 322 | 322 (HA1) | N | HA1 |
| 339 | 323 | 323 (HA1) | V | HA1 |
| 340 | 324 | 324 (HA1) | P | HA1 |
| 341 | 325 | 325 (HA1) | E | HA1 |
| 342 | 326 | 326 (HA1) | K | HA1 |
| 343 | 327 | 327 (HA1) | Q | HA1 |
| 344 | 328 | 328 (HA1) | T | HA1 |
| 345 | 329 | -         | R |     |
| 346 | 330 | 1 (HA2)   | G | HA2 |
| 347 | 331 | 2 (HA2)   | L | HA2 |
| 348 | 332 | 3 (HA2)   | F | HA2 |
| 349 | 333 | 4 (HA2)   | G | HA2 |
| 350 | 334 | 5 (HA2)   | A | HA2 |
| 351 | 335 | 6 (HA2)   | I | HA2 |
| 352 | 336 | 7 (HA2)   | A | HA2 |
| 353 | 337 | 8 (HA2)   | G | HA2 |
| 354 | 338 | 9 (HA2)   | F | HA2 |
| 355 | 339 | 1 (HA2)0  | I | HA2 |
| 356 | 340 | 11 (HA2)  | E | HA2 |
| 357 | 341 | 12 (HA2)  | N | HA2 |
| 358 | 342 | 13 (HA2)  | G | HA2 |
| 359 | 343 | 14 (HA2)  | W | HA2 |
| 360 | 344 | 15 (HA2)  | E | HA2 |
| 361 | 345 | 16 (HA2)  | G | HA2 |
| 362 | 346 | 17 (HA2)  | M | HA2 |
| 363 | 347 | 18 (HA2)  | I | HA2 |
| 364 | 348 | 19 (HA2)  | D | HA2 |
| 365 | 349 | 20 (HA2)  | G | HA2 |
| 366 | 350 | 21 (HA2)  | W | HA2 |
| 367 | 351 | 22 (HA2)  | Y | HA2 |
| 368 | 352 | 23 (HA2)  | G | HA2 |
| 369 | 353 | 24 (HA2)  | F | HA2 |
| 370 | 354 | 25 (HA2)  | R | HA2 |



|     |     |          |   |     |
|-----|-----|----------|---|-----|
| 371 | 355 | 26 (HA2) | H | HA2 |
| 372 | 356 | 27 (HA2) | Q | HA2 |
| 373 | 357 | 28 (HA2) | N | HA2 |
| 374 | 358 | 29 (HA2) | S | HA2 |
| 375 | 359 | 30 (HA2) | E | HA2 |
| 376 | 360 | 31 (HA2) | G | HA2 |
| 377 | 361 | 32 (HA2) | T | HA2 |
| 378 | 362 | 33 (HA2) | G | HA2 |
| 379 | 363 | 34 (HA2) | Q | HA2 |
| 380 | 364 | 35 (HA2) | A | HA2 |
| 381 | 365 | 36 (HA2) | A | HA2 |
| 382 | 366 | 37 (HA2) | D | HA2 |
| 383 | 367 | 38 (HA2) | L | HA2 |
| 384 | 368 | 39 (HA2) | K | HA2 |
| 385 | 369 | 40 (HA2) | S | HA2 |
| 386 | 370 | 41 (HA2) | T | HA2 |
| 387 | 371 | 42 (HA2) | Q | HA2 |
| 388 | 372 | 43 (HA2) | A | HA2 |
| 389 | 373 | 44 (HA2) | A | HA2 |
| 390 | 374 | 45 (HA2) | I | HA2 |
| 391 | 375 | 46 (HA2) | D | HA2 |
| 392 | 376 | 47 (HA2) | Q | HA2 |
| 393 | 377 | 48 (HA2) | I | HA2 |
| 394 | 378 | 49 (HA2) | N | HA2 |
| 395 | 379 | 50 (HA2) | G | HA2 |
| 396 | 380 | 51 (HA2) | K | HA2 |
| 397 | 381 | 52 (HA2) | L | HA2 |
| 398 | 382 | 53 (HA2) | N | HA2 |
| 399 | 383 | 54 (HA2) | R | HA2 |
| 400 | 384 | 55 (HA2) | V | HA2 |
| 401 | 385 | 56 (HA2) | I | HA2 |
| 402 | 386 | 57 (HA2) | E | HA2 |
| 403 | 387 | 58 (HA2) | K | HA2 |
| 404 | 388 | 59 (HA2) | T | HA2 |
| 405 | 389 | 60 (HA2) | N | HA2 |
| 406 | 390 | 61 (HA2) | E | HA2 |
| 407 | 391 | 62 (HA2) | K | HA2 |
| 408 | 392 | 63 (HA2) | F | HA2 |
| 409 | 393 | 64 (HA2) | H | HA2 |
| 410 | 394 | 65 (HA2) | Q | HA2 |
| 411 | 395 | 66 (HA2) | I | HA2 |
| 412 | 396 | 67 (HA2) | E | HA2 |
| 413 | 397 | 68 (HA2) | K | HA2 |
| 414 | 398 | 69 (HA2) | E | HA2 |
| 415 | 399 | 70 (HA2) | F | HA2 |
| 416 | 400 | 71 (HA2) | S | HA2 |
| 417 | 401 | 72 (HA2) | E | HA2 |
| 418 | 402 | 73 (HA2) | V | HA2 |
| 419 | 403 | 74 (HA2) | E | HA2 |
| 420 | 404 | 75 (HA2) | G | HA2 |
| 421 | 405 | 76 (HA2) | R | HA2 |
| 422 | 406 | 77 (HA2) | I | HA2 |
| 423 | 407 | 78 (HA2) | Q | HA2 |
| 424 | 408 | 79 (HA2) | D | HA2 |

|     |     |           |   |     |
|-----|-----|-----------|---|-----|
| 425 | 409 | 80 (HA2)  | L | HA2 |
| 426 | 410 | 81 (HA2)  | E | HA2 |
| 427 | 411 | 82 (HA2)  | K | HA2 |
| 428 | 412 | 83 (HA2)  | Y | HA2 |
| 429 | 413 | 84 (HA2)  | V | HA2 |
| 430 | 414 | 85 (HA2)  | E | HA2 |
| 431 | 415 | 86 (HA2)  | D | HA2 |
| 432 | 416 | 87 (HA2)  | T | HA2 |
| 433 | 417 | 88 (HA2)  | K | HA2 |
| 434 | 418 | 89 (HA2)  | I | HA2 |
| 435 | 419 | 90 (HA2)  | D | HA2 |
| 436 | 420 | 91 (HA2)  | L | HA2 |
| 437 | 421 | 92 (HA2)  | W | HA2 |
| 438 | 422 | 93 (HA2)  | S | HA2 |
| 439 | 423 | 94 (HA2)  | Y | HA2 |
| 440 | 424 | 95 (HA2)  | N | HA2 |
| 441 | 425 | 96 (HA2)  | A | HA2 |
| 442 | 426 | 97 (HA2)  | E | HA2 |
| 443 | 427 | 98 (HA2)  | L | HA2 |
| 444 | 428 | 99 (HA2)  | L | HA2 |
| 445 | 429 | 10 (HA2)0 | V | HA2 |
| 446 | 430 | 101 (HA2) | A | HA2 |
| 447 | 431 | 102 (HA2) | L | HA2 |
| 448 | 432 | 103 (HA2) | E | HA2 |
| 449 | 433 | 104 (HA2) | N | HA2 |
| 450 | 434 | 105 (HA2) | Q | HA2 |
| 451 | 435 | 106 (HA2) | H | HA2 |
| 452 | 436 | 107 (HA2) | T | HA2 |
| 453 | 437 | 108 (HA2) | I | HA2 |
| 454 | 438 | 109 (HA2) | D | HA2 |
| 455 | 439 | 110 (HA2) | L | HA2 |
| 456 | 440 | 111 (HA2) | T | HA2 |
| 457 | 441 | 112 (HA2) | D | HA2 |
| 458 | 442 | 113 (HA2) | S | HA2 |
| 459 | 443 | 114 (HA2) | E | HA2 |
| 460 | 444 | 115 (HA2) | M | HA2 |
| 461 | 445 | 116 (HA2) | N | HA2 |
| 462 | 446 | 117 (HA2) | K | HA2 |
| 463 | 447 | 118 (HA2) | L | HA2 |
| 464 | 448 | 119 (HA2) | F | HA2 |
| 465 | 449 | 120 (HA2) | E | HA2 |
| 466 | 450 | 121 (HA2) | K | HA2 |
| 467 | 451 | 122 (HA2) | T | HA2 |
| 468 | 452 | 123 (HA2) | R | HA2 |
| 469 | 453 | 124 (HA2) | R | HA2 |
| 470 | 454 | 125 (HA2) | Q | HA2 |
| 471 | 455 | 126 (HA2) | L | HA2 |
| 472 | 456 | 127 (HA2) | R | HA2 |
| 473 | 457 | 128 (HA2) | E | HA2 |
| 474 | 458 | 129 (HA2) | N | HA2 |
| 475 | 459 | 130 (HA2) | A | HA2 |
| 476 | 460 | 131 (HA2) | E | HA2 |
| 477 | 461 | 132 (HA2) | E | HA2 |
| 478 | 462 | 133 (HA2) | M | HA2 |

|     |     |           |   |                 |
|-----|-----|-----------|---|-----------------|
| 479 | 463 | 134 (HA2) | G | HA2             |
| 480 | 464 | 135 (HA2) | N | HA2             |
| 481 | 465 | 136 (HA2) | G | HA2             |
| 482 | 466 | 137 (HA2) | C | HA2             |
| 483 | 467 | 138 (HA2) | F | HA2             |
| 484 | 468 | 139 (HA2) | K | HA2             |
| 485 | 469 | 140 (HA2) | I | HA2             |
| 486 | 470 | 141 (HA2) | Y | HA2             |
| 487 | 471 | 142 (HA2) | H | HA2             |
| 488 | 472 | 143 (HA2) | K | HA2             |
| 489 | 473 | 144 (HA2) | C | HA2             |
| 490 | 474 | 145 (HA2) | D | HA2             |
| 491 | 475 | 146 (HA2) | N | HA2             |
| 492 | 476 | 147 (HA2) | A | HA2             |
| 493 | 477 | 148 (HA2) | C | HA2             |
| 494 | 478 | 149 (HA2) | I | HA2             |
| 495 | 479 | 150 (HA2) | E | HA2             |
| 496 | 480 | 151 (HA2) | S | HA2             |
| 497 | 481 | 152 (HA2) | I | HA2             |
| 498 | 482 | 153 (HA2) | R | HA2             |
| 499 | 483 | 154 (HA2) | N | HA2             |
| 500 | 484 | 155 (HA2) | G | HA2             |
| 501 | 485 | 156 (HA2) | T | HA2             |
| 502 | 486 | 157 (HA2) | Y | HA2             |
| 503 | 487 | 158 (HA2) | D | HA2             |
| 504 | 488 | 159 (HA2) | H | HA2             |
| 505 | 489 | 160 (HA2) | D | HA2             |
| 506 | 490 | 161 (HA2) | V | HA2             |
| 507 | 491 | 162 (HA2) | Y | HA2             |
| 508 | 492 | 163 (HA2) | R | HA2             |
| 509 | 493 | 164 (HA2) | D | HA2             |
| 510 | 494 | 165 (HA2) | E | HA2             |
| 511 | 495 | 166 (HA2) | A | HA2             |
| 512 | 496 | 167 (HA2) | L | HA2             |
| 513 | 497 | 168 (HA2) | N | HA2             |
| 514 | 498 | 169 (HA2) | N | HA2             |
| 515 | 499 | 170 (HA2) | R | HA2             |
| 516 | 500 | 171 (HA2) | F | HA2             |
| 517 | 501 | 172 (HA2) | Q | HA2             |
| 518 | 502 | 173 (HA2) | I | HA2             |
| 519 | 503 | 174 (HA2) | K | HA2             |
| 520 | 504 | 175 (HA2) | G | HA2             |
| 521 | 505 | -         | V | Flexible Linker |
| 522 | 506 | -         | E | Flexible Linker |
| 523 | 507 | -         | L | Flexible Linker |
| 524 | 508 | -         | K | Flexible Linker |
| 525 | 509 | -         | S | Flexible Linker |
| 526 | 510 | -         | G | Flexible Linker |
| 527 | 511 | -         | Y | Flexible Linker |
| 528 | 512 | -         | K | Flexible Linker |
| 529 | 513 | -         | D |                 |
| 530 | 514 | -         | W | Transmembrane   |
| 531 | 515 | -         | I | Transmembrane   |
| 532 | 516 | -         | L | Transmembrane   |

|     |     |   |   |               |
|-----|-----|---|---|---------------|
| 533 | 517 | - | W | Transmembrane |
| 534 | 518 | - | I | Transmembrane |
| 535 | 519 | - | S | Transmembrane |
| 536 | 520 | - | F | Transmembrane |
| 537 | 521 | - | A | Transmembrane |
| 538 | 522 | - | I | Transmembrane |
| 539 | 523 | - | S | Transmembrane |
| 540 | 524 | - | C | Transmembrane |
| 541 | 525 | - | F | Transmembrane |
| 542 | 526 | - | L | Transmembrane |
| 543 | 527 | - | L | Transmembrane |
| 544 | 528 | - | C | Transmembrane |
| 545 | 529 | - | V | Transmembrane |
| 546 | 530 | - | V | Transmembrane |
| 547 | 531 | - | L | Transmembrane |
| 548 | 532 | - | L | Transmembrane |
| 549 | 533 | - | G | Transmembrane |
| 550 | 534 | - | F | Transmembrane |
| 551 | 535 | - | I | Transmembrane |
| 552 | 536 | - | M | Transmembrane |
| 553 | 537 | - | W | Transmembrane |
| 554 | 538 | - | A | Transmembrane |
| 555 | 539 | - | C |               |
| 556 | 540 | - | Q |               |
| 557 | 541 | - | R |               |
| 558 | 542 | - | G |               |
| 559 | 543 | - | N |               |
| 560 | 544 | - | I |               |
| 561 | 545 | - | R |               |
| 562 | 546 | - | C |               |
| 563 | 547 | - | N |               |
| 564 | 548 | - | I |               |
| 565 | 549 | - | C |               |
| 566 | 550 | - | I |               |

---
